# Supplementary material for: Photoinduced Chloroamination Cyclization Cascade with N-Chlorosuccinimide: From N-(Allenyl)sulfonylamides to 2-(1-Chlorovinyl)pyrrolidines
Source: PubMed Central journal article supplement (PMC10204091; doi:10.1021/acs.joc.2c01963), 2022-10-26
Supplement: jo2c01963_si_001.pdf [file jo2c01963_si_001.pdf]

## Supporting Information - Computational Data

### Photoinduced Chloroamination Cyclization Cascade with *N*-Chlorosuccinimide: from *N*-(Allenyl)sulfonylamides to 2-(1-Chlorovinyl)pyrrolidines.

Emanuele Azzi, Giovanni Ghigo, Lorenzo Sarasino, Stefano Parisotto, Riccardo Moro, Polyssena Renzi\*  
and Annamaria Deagostino

Department of Chemistry, University of Torino, Via P. Giuria 7, 10125, Turin, Italy

Corresponding author's email address: polyssena.renzi@unito.it

#### Table of Content

|                                                                                                                     |      |
|---------------------------------------------------------------------------------------------------------------------|------|
| § 1 Computational method.                                                                                           | S-2  |
| § 2 The conversion of the allene <b>1a</b> to the <i>N</i> -chloroallene <b>3a</b> .                                | S-3  |
| § 3 The generation of the NCR <b>1a</b> <sup>•</sup> from the photolysis of the <i>N</i> -chloro-allene <b>3a</b> . | S-6  |
| § 4 The radical reaction mechanism from the <i>N</i> -Centered Radical <b>1a</b> <sup>•</sup> .                     | S-11 |
| § 5 Pictures and Cartesian coordinates of optimized structures M06/def2-TZVP.                                       | S-16 |

## § 1 Computational method.

The structures of the reactants, intermediates and transition states have been optimized by using the density functional method (DFT)<sup>1</sup> with the functional M06<sup>2,3</sup> and the basis sets def2-SVP.<sup>4</sup> The electronic energy values were refined by re-optimization with the basis set def2-TZVP.<sup>5</sup> The nature of the critical points was characterized by using vibrational analysis<sup>6</sup> which also furnished the Zero Point Energies (ZPE) and entropies for the calculations of the Free Energies. These have been converted from the gas phase to the 1 M standard state at 1 atm and 298.15 K.<sup>7</sup> The solvent effects (toluene) were introduced in all calculations using the universal solvation model (SMD) by Truhlar *et al.*<sup>8</sup> The real environment is not the pure toluene but a more polar environment because of the presence of large amounts (1/4) of methylformiate for which, unfortunately, the solvent parameters are not available. The rate constants of the title reactions are calculated using canonical transition state theory(CTST):<sup>9</sup>

$$k = \sigma \cdot (k_B \cdot T / h_P) \cdot c \cdot \exp(-\Delta G^\ddagger / RT)$$

in which  $\sigma$  is the symmetry number,  $k_B$  the Boltzmann constant,  $h_P$  the Planck constant,  $c$  is 1 for monomolecular reactions and  $RT$  for bimolecular reactions. The singlet excited states have been optimized with the Time-Dependent DFT.<sup>10</sup> The calculations were performed by the quantum package Gaussian 16-A.03<sup>11</sup> The figures were obtained using the graphical program Molden.<sup>12</sup>

[1] R. G. Parr, Density Functional Theory of Atoms and Molecules, in: Horizons Quantum Chem., Springer Netherlands, 1980: pp. 5–15. DOI:10.1007/978-94-009-9027-2\_2.

[2] Y. Zhao, D.G. Truhlar, The M06 suite of density functionals for main group thermochemistry, thermochemical kinetics, noncovalent interactions, excited states, and transition elements: Two new functionals and systematic testing of four M06-class functionals and 12 other function, *Theor. Chem. Acc.* 120 (2008) 215–241, DOI: 10.1007/s00214-007-0310-x.

[3] Y. Zhao, D.G. Truhlar, Density functionals with broad applicability in chemistry, *Acc. Chem. Res.* 41 (2008) 157–167, DOI: 10.1021/ar700111a.

[4] A. Schaefer, H. Horn, and R. Ahlrichs, “Fully optimized contracted Gaussian-basis sets for atoms Li to Kr,” *J. Chem. Phys.*, 97 (1992) 2571–2577. DOI: 10.1063/1.463096.

[5] A. Schaefer, C. Huber, and R. Ahlrichs, “Fully optimized contracted Gaussian-basis sets of triple zeta valence quality for atoms Li to Kr,” *J. Chem. Phys.*, 100 (1994) 5829–5835. DOI: 10.1063/1.467146 .

[6] J. Foresman, A. Frisch, Exploring chemistry with electronic structure methods, 1996, Gaussian Inc, Pittsburgh, PA, 1996, <http://gaussian.com/expchem3/>(accessed June 4, 2021).

[7] R.F. Ribeiro, A.V. Marenich, C.J. Cramer, D.G. Truhlar, Use of solution-phase vibrational frequencies in continuum models for the free energy of solvation, *J. Phys. Chem. B.* 115 (2011) 14556–14562, DOI: 10.1021/jp205508z.

[8] A. V. Marenich, C. J. Cramer, and D. G. Truhlar, “Universal solvation model based on solute electron density and a continuum model of the solvent defined by the bulk dielectric constant and atomic surface tensions,” *J. Phys. Chem. B.* 113 (2009) 6378–6396. DOI: 10.1021/jp810292n .

[9] D. G. Truhlar, B. C. Garrett, and S. J. Klippenstein, Current Status of Transition-State Theory, *J. Phys. Chem.* **1996**, 100, 12771–12800. DOI: 10.1021/jp953748q

[10] F. Furche and R. Ahlrichs, “Adiabatic time-dependent density functional methods for excited state properties,” *J. Chem. Phys.*, 117 (2002) 7433–7447. DOI: 10.1063/1.1508368

[11] D.J. Frisch, M. J.; Trucks, G. W.; Schlegel, H. B.; Scuseria, G. E.; Robb, M. A.; Cheeseman, J. R.; Scalmani, G.; Barone, V.; Petersson, G. A.; Nakatsuji, H.; Li, X.; Caricato, M.; Marenich, A. V.; Bloino, J.; Janesko, B. G.; Gomperts, R.; Mennucci, B.; Hratch, Gaussian 16, Revision A.03, (2016).

[12] G. Schaftenaar, J.H. Noordik, Molden: A pre- and post-processing program for molecular and electronic structures, *J. Comput. Aided. Mol. Des.* 14 (2000) 123–134, DOI: 10.1023/A:1008193805436.

## § 2 The conversion of the allene 1a to the *N*-chloroallene 3.

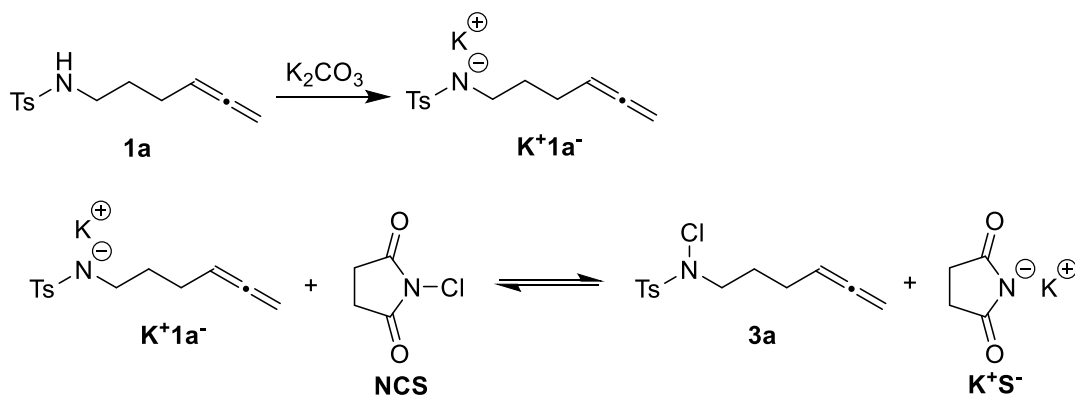

**Scheme S-1.** The conversion of the allene **1a** into the *N*-Chloro allene **3a**.

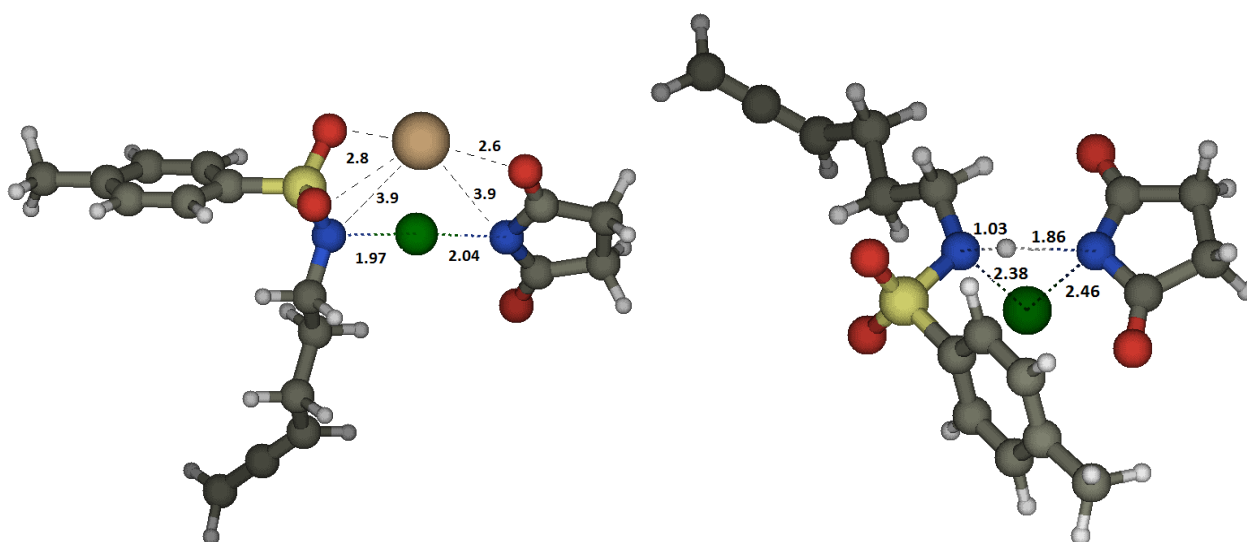

**Figure S-1.** The transition structures for the generation of the *N*-chloro-allene **3a** from the reaction of NCS with the potassium-allene **K<sup>+</sup>1a<sup>-</sup>** (left) and with the allene **1a** (right)..

**Table S-1a.** Calculated absolute and relative (in kcal mol<sup>-1</sup>) energies of the deprotonation of **1** by K<sub>2</sub>CO<sub>3</sub>.

| Table S-1a                                  |                                    | E /au <sup>a</sup> | $\Delta E$   | ZPE /<br>au <sup>a</sup> | $\delta G$ / au <sup>a</sup> | E TZ(D)/ au <sup>b</sup> | $\Delta E$   | E <sup>0K</sup> /au <sup>c</sup> | $\Delta E^{0K}$ | G TZ(D) / au <sup>c</sup> | $\Delta n$ | $\Delta G^{298K}$ |
|---------------------------------------------|------------------------------------|--------------------|--------------|--------------------------|------------------------------|--------------------------|--------------|----------------------------------|-----------------|---------------------------|------------|-------------------|
| Allene                                      | <b>1a</b>                          | -1107.771260       |              | 0.274690                 | 0.224308                     | -1108.720750             |              | -1108.446060                     |                 | -1108.496442              |            |                   |
| K <sub>2</sub> CO <sub>3</sub>              |                                    | -1463.307662       |              | 0.016895                 | 0.016459                     | -1463.744232             |              | -1463.727337                     |                 | -1463.760691              |            |                   |
| <b>K<sub>2</sub>CO<sub>3</sub> + Allene</b> |                                    | -2571.078922       | <b>0.00</b>  | 0.291585                 | 0.207849                     | -2572.464982             | <b>0.00</b>  | -2572.173397                     | <b>0.00</b>     | -2572.257133              | <b>0</b>   | <b>0.00</b>       |
| KHCO <sub>3</sub>                           |                                    | -864.025213        |              | 0.027832                 | 0.002201                     | -864.386440              |              | -864.358608                      |                 | -864.388641               |            |                   |
| K <sup>+</sup> -Allene-Anion                | <b>K<sup>+</sup>1a<sup>-</sup></b> | -1707.060127       |              | 0.262633                 | 0.209330                     | -1708.085874             |              | -1707.823241                     |                 | -1707.876544              |            |                   |
| <b>KHCO<sub>3</sub> + Allene Anion K</b>    |                                    | -2571.085340       | <b>-4.03</b> | 0.290465                 | 0.207129                     | -2572.472314             | <b>-4.60</b> | -2572.181849                     | <b>-5.30</b>    | -2572.265185              | <b>0</b>   | <b>-5.05</b>      |

<sup>a</sup> M06/def2-SVP; <sup>b</sup> M06/def2-TZVP; <sup>c</sup> M06/def2-TZVP energies combined with thermal corrections M06/def2-SVP.

**Table S-1b.** Calculated absolute and relative (in kcal mol<sup>-1</sup>) energies of the generation of **3a** from **K<sup>+</sup>1a<sup>-</sup>** and NCS.

| Table S-1b                                            |                                    | E /au <sup>a</sup> | $\Delta E$   | ZPE /<br>au <sup>a</sup> | $\delta G$ / au <sup>a</sup> | E TZ(D)/ au <sup>b</sup> | $\Delta E$   | E <sup>0K</sup> /au <sup>c</sup> | $\Delta E^{0K}$ | G TZ(D) / au <sup>c</sup> | $\Delta n$ | $\Delta G^{298K}$ |
|-------------------------------------------------------|------------------------------------|--------------------|--------------|--------------------------|------------------------------|--------------------------|--------------|----------------------------------|-----------------|---------------------------|------------|-------------------|
| K <sup>+</sup> -Allene-Anion                          | <b>K<sup>+</sup>1a<sup>-</sup></b> | -1707.060127       |              | 0.262633                 | 0.209330                     | -1708.085874             |              | -1707.823241                     |                 | -1707.876544              |            |                   |
| <i>N</i> -ChloroSuccinimide                           | <b>NCS</b>                         | -819.625317        |              | 0.081360                 | 0.048204                     | -820.161245              |              | -820.079885                      |                 | -820.113041               |            |                   |
| <b>AK + NCS</b>                                       |                                    | -2526.685444       | <b>0.00</b>  | 0.343993                 | 0.257534                     | -2528.247119             | <b>0.00</b>  | -2527.903126                     | <b>0.00</b>     | -2527.989585              | <b>0</b>   | <b>0.00</b>       |
| <b>TS<sub>Cl-Exc</sub> K<sup>+</sup>-Allene + NCS</b> |                                    | -2526.706675       | <b>13.32</b> | 0.344886                 | 0.280441                     | -2528.261045             | <b>-8.74</b> | -2527.916159                     | <b>-8.18</b>    | -2527.980604              | <b>-1</b>  | <b>3.74</b>       |
| <i>N</i> -ChloroAllene                                | <b>3a</b>                          | -1567.173516       |              | 0.264483                 | 0.213056                     | -1568.270206             |              | -1568.005722                     |                 | -1568.057149              |            |                   |
| K <sup>+</sup> -Succinimide                           | <b>K<sup>+</sup>S<sup>-</sup></b>  | -959.515812        |              | 0.079820                 | 0.045996                     | -959.978366              |              | -959.898546                      |                 | -959.932370               |            |                   |
| <b><i>N</i>-ChloroAllene + KSA</b>                    |                                    | -2526.689329       | <b>-2.44</b> | 0.344304                 | 0.259053                     | -2528.248572             | <b>-0.91</b> | -2527.904268                     | <b>-0.72</b>    | -2527.989519              | <b>0</b>   | <b>0.04</b>       |

<sup>a</sup> M06/def2-SVP; <sup>b</sup> M06/def2-TZVP; <sup>c</sup> M06/def2-TZVP energies combined with thermal corrections M06/def2-SVP.

**Table S-1c.** Calculated absolute and relative (in kcal mol<sup>-1</sup>) energies of the of **3a** from **1a** and NCS.

| Table S-1c                              |            | E /au <sup>a</sup> | $\Delta E$   | ZPE /<br>au <sup>a</sup> | $\delta G$ / au <sup>a</sup> | E TZ(D)/ au <sup>b</sup> | $\Delta E$   | E <sup>0K</sup> /au <sup>c</sup> | $\Delta E^{0K}$ | G TZ(D) / au <sup>c</sup> | $\Delta n$ | $\Delta G^{298K}$ |
|-----------------------------------------|------------|--------------------|--------------|--------------------------|------------------------------|--------------------------|--------------|----------------------------------|-----------------|---------------------------|------------|-------------------|
| Allene                                  | <b>1a</b>  | -1107.771260       |              | 0.274690                 | 0.224308                     | -1108.720750             |              | -1108.446060                     |                 | -1108.496442              |            |                   |
| N-ChloroSuccinimide                     | <b>NCS</b> | -819.625317        |              | 0.081360                 | 0.048204                     | -820.161245              |              | -820.079885                      |                 | -820.113041               |            |                   |
| <b>Allene + NCS</b>                     |            | -1927.396577       | <b>0.00</b>  | 0.356050                 | 0.272512                     | -1928.881995             | <b>0.00</b>  | -1928.525945                     | <b>0.00</b>     | -1928.609483              | <b>0</b>   | <b>0.00</b>       |
| <b>TS<sub>Cl-Exc</sub> Allene + NCS</b> |            | -1927.297455       | <b>62.20</b> | 0.353799                 | 0.292455                     | -1928.772589             | <b>68.65</b> | -1928.418790                     | <b>67.24</b>    | -1928.480134              | <b>-1</b>  | <b>79.27</b>      |
| N-ChloroAllene                          | <b>3a</b>  | -1567.173516       |              | 0.264483                 | 0.213056                     | -1568.270206             |              | -1568.005722                     |                 | -1568.057149              |            |                   |
| Succinimide                             | <b>SH</b>  | -360.224868        |              | 0.091370                 | 0.060806                     | -360.611951              |              | -360.520581                      |                 | -360.551145               |            |                   |
| <b>N-ChloroAllene + SA</b>              |            | -1927.398384       | <b>-1.13</b> | 0.355853                 | 0.273862                     | -1928.882157             | <b>-0.10</b> | -1928.526304                     | <b>-0.23</b>    | -1928.608295              | <b>0</b>   | <b>0.75</b>       |

<sup>a</sup> M06/def2-SVP; <sup>b</sup> M06/def2-TZVP; <sup>c</sup> M06/def2-TZVP enegies combined with thermal corrections M06/def2-SVP.

### § 3 The generation of the NCR 1a' from the photolysis of the *N*-chloro-allene 3a.

The experiments demonstrated that the reaction can take place even without the photocatalyzer but in the presence of the light. This would be possible if we consider an alternative pathway that involves the *N*-chloro-allene **3a** (Figure S-2a, left) that can be generated from NCS and the allene **1a** in the presence of the base. The homolysis of the N–Cl bond is thermodynamically prohibitive ( $\Delta G = 43.7 \text{ kcal mol}^{-1}$ , Table S-2a) but the VIS-UV spectrum of *N*-chloro-allene **3a** shows a weak absorption below 350 nm that can activate the molecule. We verified this hypothesis by TD-DFT calculations and we found that the first excited state of **3** presents a complicated electronic structure that involves several MOs in the electronic transition. The differential density map (Figure S-2a, right) shows that it corresponds to an electronic transition from the  $n_N$  and some of the  $\pi$  orbitals mainly to the  $\sigma^*$  of the N–Cl bond.

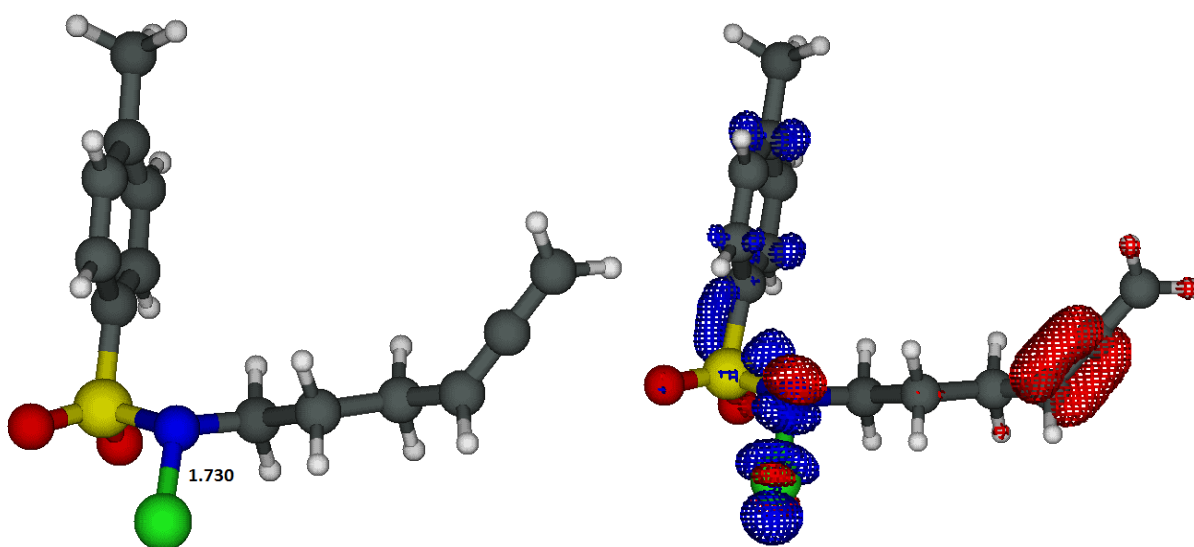

**Figure S-2a.** Molecular structure of the *N*-chloro-allene **3a** (left) and differential density map of its first excited state (right, the red areas correspond to a reduction in the electronic density when going from  $S_0$  to  $S_1$ , and the blue areas correspond to an increase in the electronic density).

As a consequence of the population of the  $\sigma_{\text{NCl}}^*$ , the optimization of the  $S_1$  state (located  $62.4 \text{ kcal mol}^{-1}$  above **3a** in term of energy,  $\Delta E$ , Table S-2b) leads to an elongation of the N–Cl bond from 1.730 to 2.355 Å (Figure S-2b, left) that can prelude to its dissociation. The electronic structure of the optimized  $S_1$  state sees a large population of the  $\sigma_{\text{NCl}}^*$  (Figure S-2b, right).

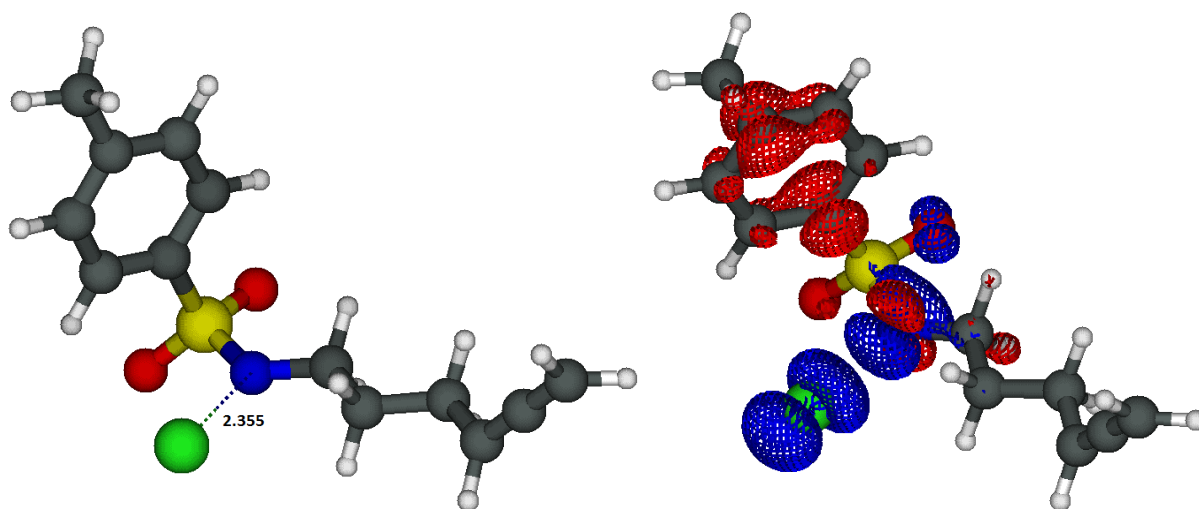

**Figure S-2b.** Molecular structure (left) and differential density map of the first excited state  $S_1$  of the *N*-chloro-allene **3a** (right, the red areas correspond to a reduction in the electronic density when going from  $S_0$  to  $S_1$ , and the blue areas correspond to an increase in the electronic density).

Serious problem in the convergence of the TD-DFT calculations prevented to study the potential energy surface of the  $S_1$  state. Fortunately, the first triplet state  $T_1$  (Table S-2c,  $\Delta E = 40.9$  and  $\Delta G = 36.6$  kcal mol $^{-1}$  with respect to **3a**) shows molecular (Figure S-2c, left) and electronic structures (Figure S-2c, right, the spin density map corresponds to a  $n_N \rightarrow \sigma_{NCl}^*$  transition) similar to that of the  $S_1$  state.

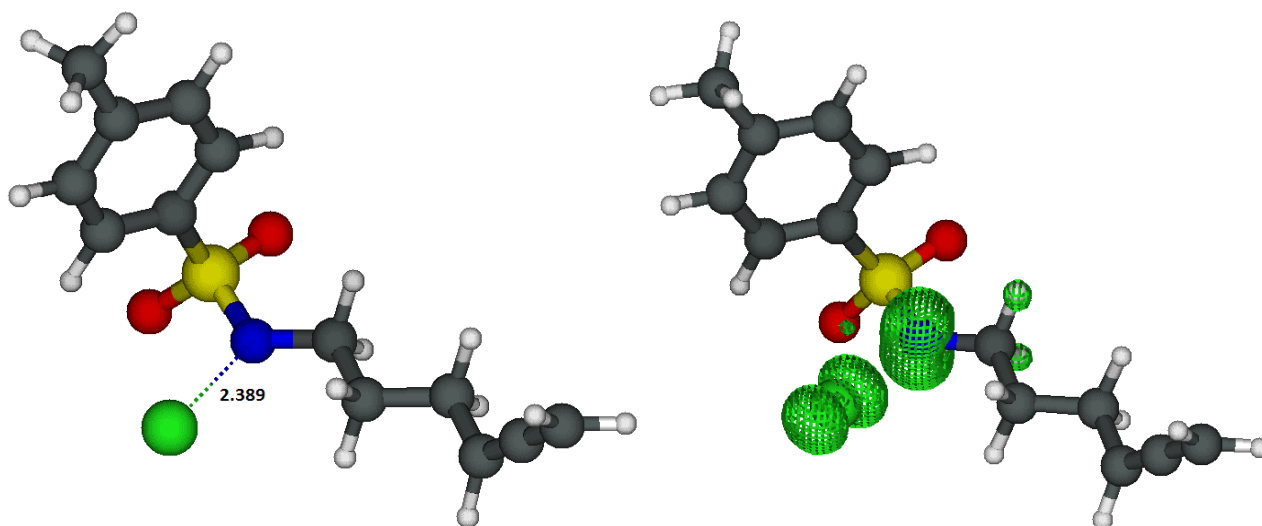

**Figure S-2c.** Molecular structure (left) and spin density map of the first excited triplet state  $T_1$  of the *N*-chloro-allene **3a** (right).

The  $T_1$  state of the *N*-chloro-allene **3a** can easily break the N–Cl bond (Figure S-2d, left,  $\Delta G^\ddagger = 7.1$  kcal mol $^{-1}$  with respect to the  $T_1$  state) to form a complex (Figure S-2d, right,  $\Delta G = 1.5$  kcal mol $^{-1}$ ) between the chlorine radical and the allenyl *N*-radical **1a'** that can dissociate to the separated radicals ( $\Delta G = -3.0$  kcal mol $^{-1}$ ). **1a'** is the intermediate that start the radical chain that lead to the final products as illustrate above (see § 4).

Because the  $T_1$  and the  $S_1$  states share similar molecular and electronic structures we believe that the easy photo-dissociation of the N–Cl bond that we calculated for the  $T_1$  state can be extended to the  $S_1$  with the advantage that from this state, being 21.5 kcal mol<sup>-1</sup> above the  $T_1$  state, the dissociation to the separated radicals is energetically more favored ( $\Delta E = -22.0$  kcal mol<sup>-1</sup> with respect to  $S_1$ )

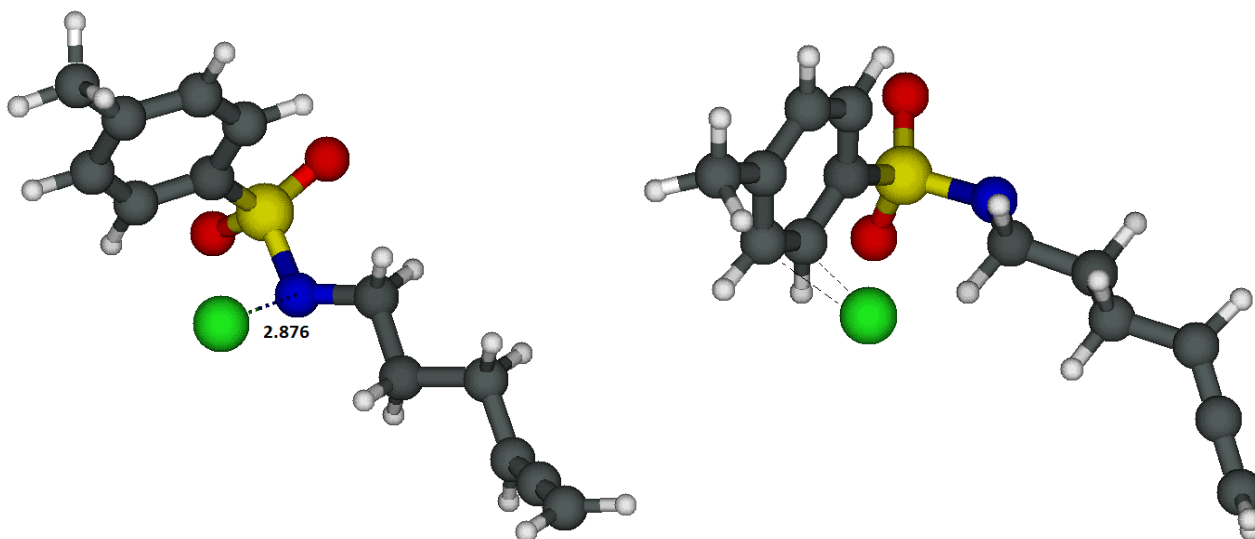

**Figure S-2d.** Transition structure (left) and radicals couple (right) of the N–Cl bond break from the first excited triplet state  $T_1$  of the *N*-chloro-allene **3a**.



**Table S-2a.** Calculated absolute and relative (in kcal mol<sup>-1</sup>) energies of N–Cl bond homolysis in **3a**.

| Table S-2a                     |            | E /au <sup>a</sup> | $\Delta E$   | ZPE / au <sup>a</sup> | $\delta G$ / au <sup>a</sup> | E TZ(D)/ au <sup>b</sup> | $\Delta E$   | E <sup>0K</sup> /au <sup>c</sup> | $\Delta E^{0K}$ | G TZ(D) / au <sup>c</sup> | $\Delta n$ | $\Delta G^{298K}$ |
|--------------------------------|------------|--------------------|--------------|-----------------------|------------------------------|--------------------------|--------------|----------------------------------|-----------------|---------------------------|------------|-------------------|
| <i>N</i> -ChloroAllene         | <b>3a</b>  | -1567.173516       | <b>0.00</b>  | 0.264483              | 0.213056                     | -1568.270206             | <b>0.00</b>  | -1568.005722                     | <b>0.00</b>     | -1568.057149              | <b>0</b>   | <b>0.00</b>       |
| Cl*                            |            | -459.985647        |              | 0.000000              | 0.015677                     | -460.129905              |              | -460.129905                      |                 | -460.145582               |            |                   |
| De-H <sup>+</sup> -Allene Rad. | <b>1a'</b> | -1107.103002       |              | 0.260254              | 0.208013                     | -1108.052955             |              | -1107.792701                     |                 | -1107.844942              |            |                   |
| Cl* + Allene Rad.              |            | -1567.088649       | <b>53.25</b> | 0.260254              | 0.192336                     | -1568.182860             | <b>54.81</b> | -1567.922605                     | <b>52.16</b>    | -1567.990523              | <b>1</b>   | <b>43.70</b>      |

<sup>a</sup> M06/def2-SVP; <sup>b</sup> M06/def2-TZVP; <sup>c</sup> M06/def2-TZVP energies combined with thermal corrections M06/def2-SVP.

**Table S-2b.** Calculated absolute and relative (in kcal mol<sup>-1</sup>) energies of the first singlet excited state S<sub>1</sub> of **3a**.

| Table S-2b                      |             | E /au <sup>a</sup> | $\Delta E$   | ZPE / au <sup>a</sup> | $\delta G$ / au <sup>a</sup> | E TZ(D)/ au <sup>b</sup> | $\Delta E$   | E <sup>0K</sup> /au <sup>c</sup> | $\Delta E^{0K}$ | G TZ(D) / au <sup>c</sup> | $\Delta n$ | $\Delta G^{298K}$ |
|---------------------------------|-------------|--------------------|--------------|-----------------------|------------------------------|--------------------------|--------------|----------------------------------|-----------------|---------------------------|------------|-------------------|
| <i>N</i> -ChloroAllene          | <b>3a</b>   | -1567.173516       | <b>0.00</b>  | 0.264483              | 0.213056                     | -1568.270206             | <b>0.00</b>  | -1568.005722                     | <b>0.00</b>     | -1568.057149              | <b>0</b>   | <b>0.00</b>       |
| S <sub>1</sub> NCA <b>13a</b> * | <b>13a*</b> | -1567.077485       | <b>60.26</b> |                       |                              | -1568.170782             | <b>62.39</b> |                                  |                 |                           |            |                   |

<sup>a</sup> M06/def2-SVP; <sup>b</sup> M06/def2-TZVP; <sup>c</sup> M06/def2-TZVP energies combined with thermal corrections M06/def2-SVP.

**Table S-2c.** Calculated absolute and relative (in kcal mol<sup>-1</sup>) energies of the first triplet excited state T<sub>1</sub> of **3a**.

| Table S-2c                                           |                        | E /au        | $\Delta E$   | E <sup>0K</sup> /au | G <sup>298K</sup> /au | E TZ(D)/ au  | $\Delta E$   | E <sup>0K</sup> /au | $\Delta E^{0K}$ | G TZ(D) / au |          | $\Delta G^{298K}$ |
|------------------------------------------------------|------------------------|--------------|--------------|---------------------|-----------------------|--------------|--------------|---------------------|-----------------|--------------|----------|-------------------|
| Triplet <i>N</i> -ChloroAllene                       | <sup>3</sup> <b>3a</b> | -1567.113094 | <b>37.92</b> | 0.261509            | 0.206204              | -1568.205077 | <b>40.87</b> | -1567.943568        | <b>39.00</b>    | -1567.998873 | <b>0</b> | <b>36.57</b>      |
| Triplet <i>N</i> -ChloroAllene                       |                        | -1567.113094 | <b>0.00</b>  | 0.261509            | 0.206204              | -1568.205077 | <b>0.00</b>  | -1567.943568        | <b>0.00</b>     | -1567.998873 | <b>0</b> | <b>0.00</b>       |
| <b>TS<sub>Cl-Det.</sub></b> vs <sup>3</sup> <b>3</b> |                        | -1567.102606 | <b>6.58</b>  | 0.260479            | 0.207413              | -1568.195016 | <b>6.31</b>  | -1567.934537        | <b>5.67</b>     | -1567.987603 | <b>0</b> | <b>7.07</b>       |
| Cpl [ Cl* * 1* ] vs <sup>3</sup> <b>3</b>            |                        | -1567.110364 | <b>1.71</b>  | 0.260965            | 0.207661              | -1568.204066 | <b>0.63</b>  | -1567.943101        | <b>0.29</b>     | -1567.996405 | <b>0</b> | <b>1.55</b>       |
| De-H <sup>+</sup> -Allene Rad.                       | <b>1a'</b>             | -1107.103002 |              | 0.260254            | 0.208013              | -1108.052955 |              | -1107.792701        |                 | -1107.844942 |          |                   |
| Cl* + 1* vs <sup>3</sup> <b>3</b>                    |                        | -1567.088649 | <b>15.34</b> | 0.260254            | 0.192336              | -1568.182860 | <b>13.94</b> | -1567.922605        | <b>13.15</b>    | -1567.990523 | <b>1</b> | <b>7.13</b>       |
| Toluene                                              |                        | -271.153085  |              | 0.126607            | 0.095949              | -271.445817  |              | -271.319210         |                 | -271.349868  |          |                   |
| Cpl [ Cl* * 1* ] + Toluene                           |                        | -1838.263449 | <b>1.71</b>  | 0.387572            | 0.303610              | -1839.649883 | <b>0.63</b>  | -1839.262311        | <b>0.29</b>     | -1839.346273 | <b>0</b> | <b>1.55</b>       |
| Cpl <sup>2</sup> [ Cl* * Toluene ]                   |                        | -731.164442  |              | 0.127239            | 0.092613              | -731.598662  |              | -731.471423         |                 | -731.506049  |          |                   |
| Cpl <sup>2</sup> [ Cl* * Toluene ] + 1*              |                        | -1838.267444 | <b>-0.79</b> | 0.387493            | 0.300626              | -1839.651617 | <b>-0.45</b> | -1839.264124        | <b>-0.84</b>    | -1839.350991 | <b>0</b> | <b>-2.96</b>      |
| 1* + Cl-T vs <sup>1</sup> <b>3</b> * + Toluene       |                        | -0.036874    | <b>23.14</b> |                     |                       | -0.035018    | <b>21.97</b> |                     |                 |              |          |                   |

<sup>a</sup> M06/def2-SVP; <sup>b</sup> M06/def2-TZVP; <sup>c</sup> M06/def2-TZVP energies combined with thermal corrections M06/def2-SVP.

### § 3 The radical reaction mechanism from the *N*-Center Radical 1a•

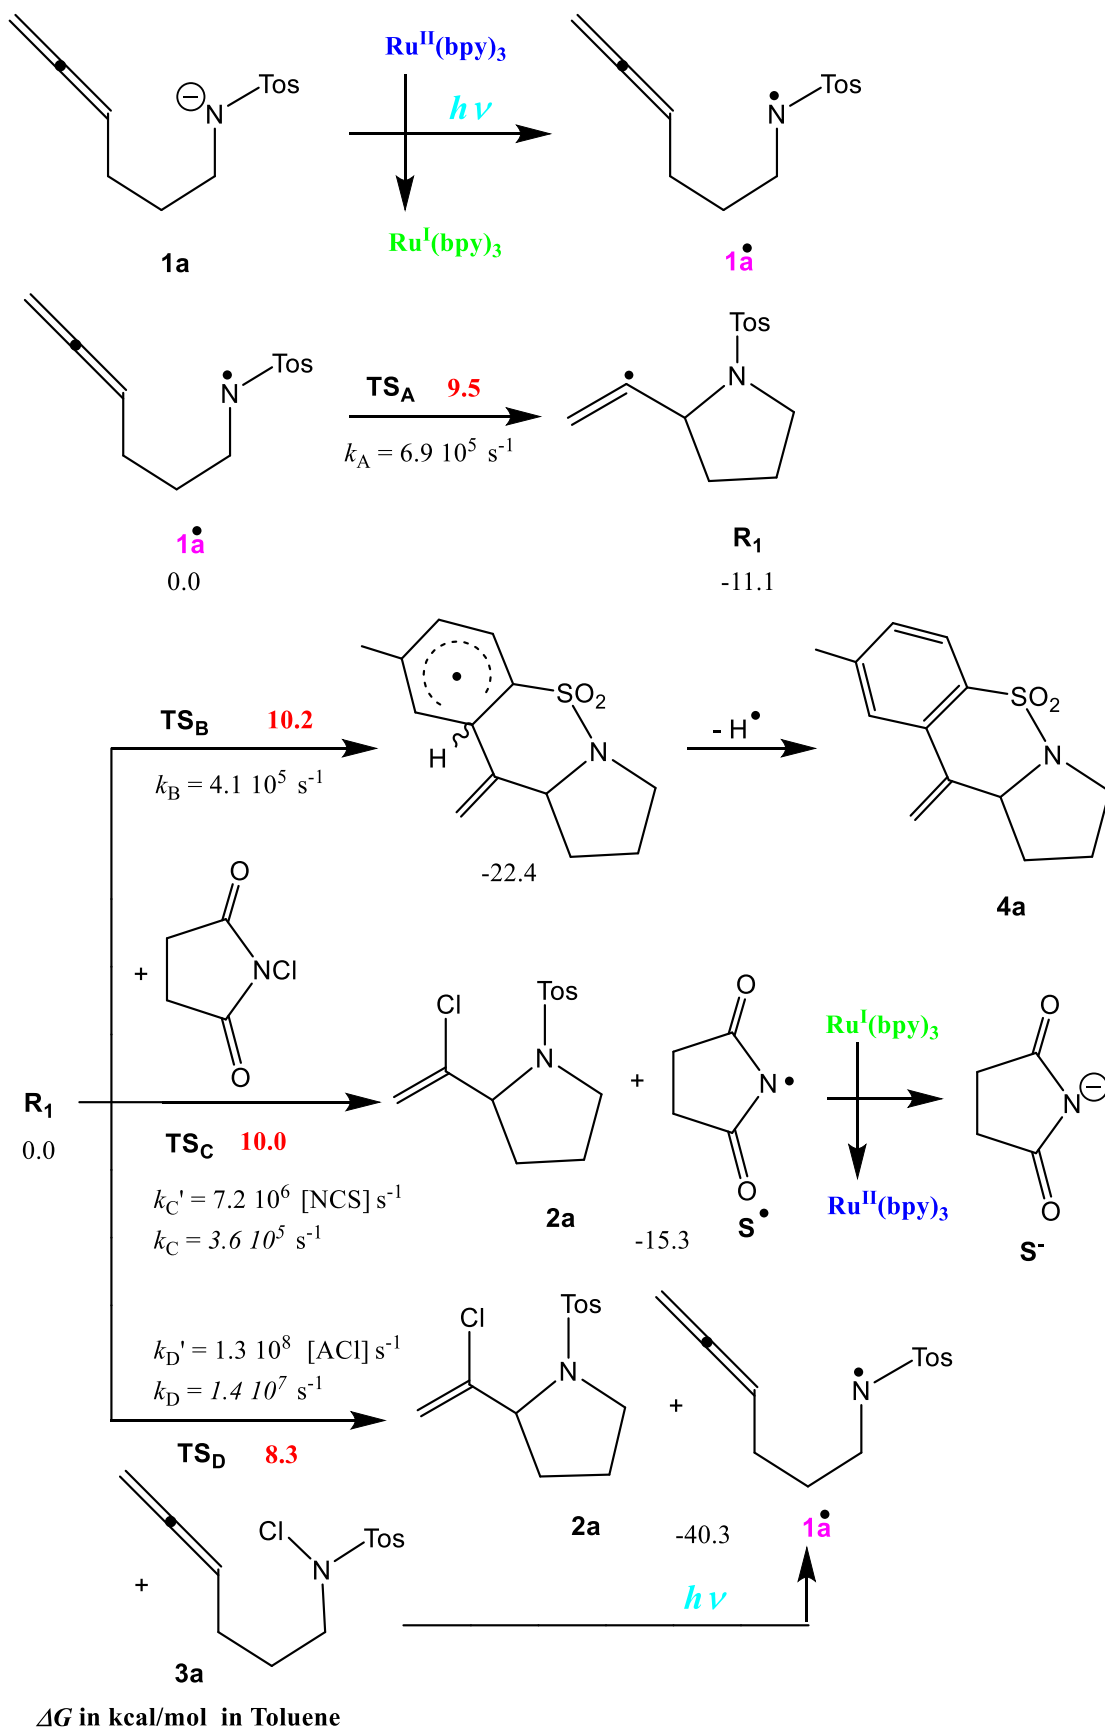

Scheme S-2. The radical reaction mechanism.

The starting radical is the NCR from the allene **1a**<sup>•</sup>, generated by the oxidation of the deprotonated allene **1a**<sup>-</sup> by the photoexcited <sup>3</sup>Ru<sup>II</sup>(bpy)<sub>3</sub> or by the photodissociation of **3a**. The first step (Scheme S-2, Table S-3) is the formation of the pyrrole ring through an intramolecular radical addition (**TS<sub>A</sub>**, Figure S-3(a) of the *N*-centered radical to the allene moiety generating the highly reactive vinyl radical **R<sub>1</sub>**. The step is fast ( $\Delta G^\ddagger = 9.5 \text{ kcal mol}^{-1}$ ,  $k_A = 6.9 \cdot 10^5 \text{ s}^{-1}$ ) and thermodynamically favored ( $\Delta G = -11.1 \text{ kcal mol}^{-1}$ ).

From the radical intermediate **R<sub>1</sub>** three pathways open: the intramolecular cyclization (**TS<sub>B</sub>**, Figure S-3(b),  $\Delta G^\ddagger = 10.2 \text{ kcal mol}^{-1}$ ,  $k_B = 4.1 \cdot 10^5 \text{ s}^{-1}$ ,  $\Delta G = -22.4 \text{ kcal mol}^{-1}$ ) towards to the tolyl moiety yielding the precursor of the product **4a**; the radical Chlorine-Atom-Transfer (CAT) from the NCS (**TS<sub>C</sub>**, Figure S-3(c),  $\Delta G^\ddagger = 10.0 \text{ kcal mol}^{-1}$ ,  $k_C' = 7.2 \cdot 10^6 \cdot [\text{NCS}] \text{ s}^{-1}$ ,  $\Delta G = -15.3 \text{ kcal mol}^{-1}$ ) yielding the main product **2a** and the succinimin-*N*-yl **S**<sup>•</sup> (the latter will be reduced to the anion by <sup>2</sup>Ru<sup>I</sup>(bpy)<sub>3</sub> regenerating the photocatalyzer); the CAT from the *N*-chloro allene **3aa** (**TS<sub>D</sub>**, Figure S-3(d),  $\Delta G^\ddagger = 8.3 \text{ kcal mol}^{-1}$ ,  $k_D' = 1.3 \cdot 10^8 \cdot [\text{ACl}] \text{ s}^{-1}$ ,  $\Delta G = -40.3 \text{ kcal mol}^{-1}$ ) also yielding the main product **2a** and a new NCR **1a**<sup>•</sup>. Both CAT are bimolecular processes that require the presence of the chlorine donor. A part for the obvious choice of NCS, the experimental and computational study suggested the this role can also be assumed by **3a** easily formed in the reaction environment (see above). On the basis of the experimental data (Table S7, entry 6) we can estimate the initial concentrations of NCS and **3** as  $0.18 \cdot 3 \cdot 0.5 \text{ M} = 0.05 \text{ M}$  and  $0.82 \cdot 3 \cdot 0.5 \text{ M} = 0.123 \text{ M}$ , respectively. Multiplying the corresponding bimolecular rate constants for these concentrations we obtain the rate constants  $k_C = 1.9 \cdot 10^5$  and  $k_D = 1.7 \cdot 10^7 \text{ s}^{-1}$ . From the sum of these two rate constants and  $k_B$  we can estimate a yield of the main product **2** of 98%. The formation of the tricyclic product **4a** is estimated to be marginal (2%) in agreement with the experimental findings (Table S8, entry 1, by-product).

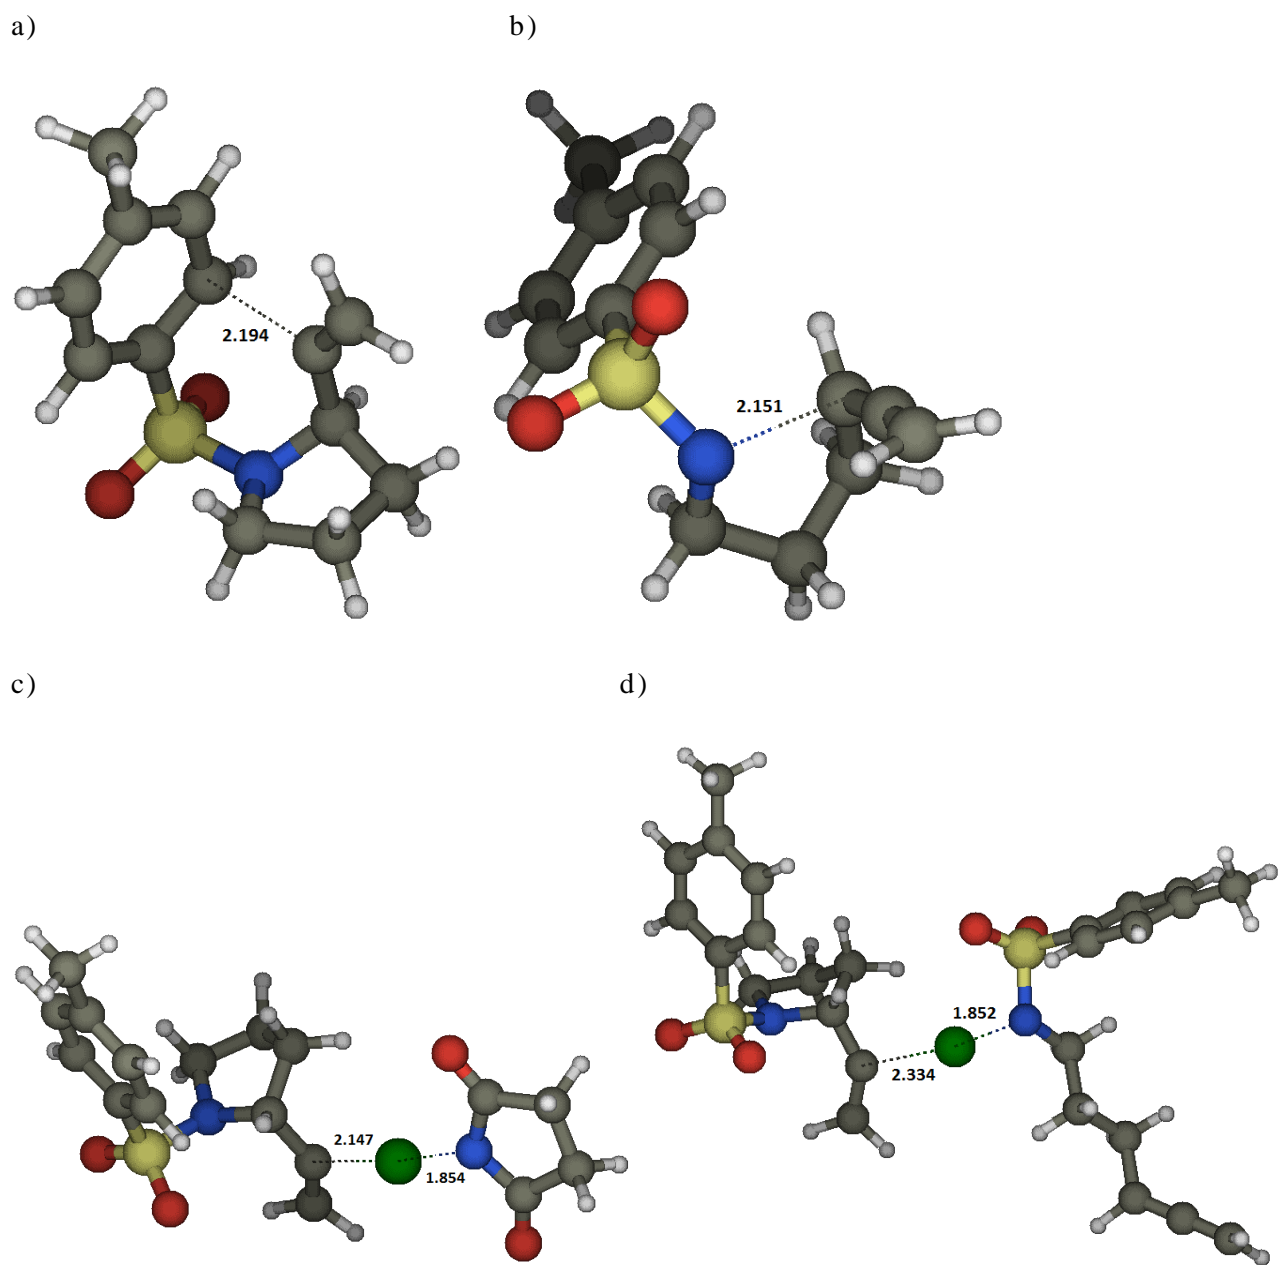

**Figure S-3.** Transition structures: (a)  $TS_A$  for the intramolecular cyclization of  $1a'$  yielding the 1-(*N*-tosylpyrrol-1-yl)vinyl radical  $R_1$ ; (b)  $TS_B$  for the intramolecular cyclization of  $R_1$  yielding the precursor of the product  $2a$ ; (c)  $TS_C$  for the CAT from NCS to  $R_1$ ; (d)  $TS_D$  for the CAT from  $3a$  to  $R_1$ .

**Table S-3.** Calculated absolute and relative (in kcal mol<sup>-1</sup>) energies for the radical reaction mechanism from the *N*-Centere Radical 1a<sup>•</sup>.

| Table S-3                                          |                       | E /au <sup>a</sup> | ΔE           | ZPE /<br>au <sup>a</sup> | δG / au <sup>a</sup> | E TZ(D)/ au <sup>b</sup> | ΔE           | E <sup>0K</sup> /au <sup>c</sup> | ΔE <sup>0K</sup> | G TZ(D) / au <sup>c</sup> | Δn        | ΔG <sup>298K</sup> |
|----------------------------------------------------|-----------------------|--------------------|--------------|--------------------------|----------------------|--------------------------|--------------|----------------------------------|------------------|---------------------------|-----------|--------------------|
| De-H <sup>+</sup> -Allene Rad.                     | <b>1a<sup>•</sup></b> | -1107.103002       |              | 0.260254                 | 0.208013             | -1108.052955             |              | -1107.792701                     |                  | -1107.844942              |           |                    |
| <i>N</i> -ChloroSuccinimide                        | <b>NCS</b>            | -819.625317        |              | 0.081360                 | 0.048204             | -820.161245              |              | -820.079885                      |                  | -820.113041               |           |                    |
| <b>Reacts 1a<sup>•</sup> + NCS</b>                 |                       | -1926.728319       | <b>0.00</b>  | 0.341614                 | 0.256217             | -1928.214200             | <b>0.00</b>  | -1927.872586                     | <b>0.00</b>      | -1927.957983              | <b>0</b>  | <b>0.00</b>        |
| <b>TS<sub>A</sub> to R<sub>1</sub></b>             | <b>TS<sub>A</sub></b> | -1107.096344       |              | 0.261053                 | 0.214031             | -1108.043854             |              | -1107.782801                     |                  | -1107.829823              |           |                    |
| <b>TS<sub>A</sub> to R<sub>1</sub> + NCS</b>       |                       | -1926.721661       | <b>4.18</b>  | 0.342413                 | 0.262235             | -1928.205099             | <b>5.71</b>  | -1927.862687                     | <b>6.21</b>      | -1927.942865              | <b>0</b>  | <b>9.49</b>        |
| R <sub>1</sub>                                     | <b>R<sub>1</sub></b>  | -1107.136071       |              | 0.264639                 | 0.217696             | -1108.080292             |              | -1107.815654                     |                  | -1107.862597              |           |                    |
|                                                    |                       |                    | -            |                          |                      |                          | -            |                                  |                  |                           |           |                    |
| <b>R<sub>1</sub> + NCS</b>                         |                       | -1926.761387       | <b>20.75</b> | 0.345998                 | 0.265899             | -1928.241537             | <b>17.15</b> | -1927.895539                     | <b>-14.40</b>    | -1927.975638              | <b>0</b>  | <b>-11.08</b>      |
| <b>TS<sub>B</sub> to Rad. 4a<sup>•</sup></b>       | <b>TS<sub>B</sub></b> | -1107.124927       | <b>6.99</b>  | 0.264682                 | 0.221541             | -1108.067868             | <b>7.80</b>  | -1107.803186                     | <b>767.50</b>    | -1107.846327              |           | <b>10.21</b>       |
|                                                    |                       |                    | -            |                          |                      |                          | -            |                                  |                  |                           |           |                    |
| <b>TS<sub>B</sub> to Rad. 4a<sup>•</sup> + NCS</b> |                       | -1926.750244       | <b>13.76</b> | 0.346042                 | 0.269745             | -1928.229113             | <b>-9.36</b> | -1927.883071                     | <b>-6.58</b>     | -1927.959368              | <b>0</b>  | <b>-0.87</b>       |
|                                                    |                       |                    | -            |                          |                      |                          | -            |                                  |                  |                           |           |                    |
| Rad. 4 <sup>•</sup> <i>Vinyl on Tol</i>            | <b>4a<sup>•</sup></b> | -1107.165672       | <b>18.58</b> | 0.267701                 | 0.225428             | -1108.106012             | <b>16.14</b> | -1107.838311                     |                  | -1107.880584              |           |                    |
|                                                    |                       |                    | -            |                          |                      |                          | -            |                                  |                  |                           |           |                    |
| <b>Rad. 4a<sup>•</sup> + NCS</b>                   |                       | -1926.790989       | <b>39.33</b> | 0.349061                 | 0.273632             | -1928.267257             | <b>33.29</b> | -1927.918196                     | <b>-28.62</b>    | -1927.993625              | <b>0</b>  | <b>-22.37</b>      |
|                                                    |                       |                    | -            |                          |                      |                          | -            |                                  |                  |                           |           |                    |
| <b>Cpl [ R<sub>1</sub> NCS ]</b>                   |                       | -1926.769555       | <b>25.88</b> | 0.346952                 | 0.284250             | -1928.247417             | <b>20.84</b> | -1927.900465                     | <b>-17.49</b>    | -1927.963167              | <b>-1</b> | <b>-5.15</b>       |
|                                                    |                       |                    | -            |                          |                      |                          | -            |                                  |                  |                           |           |                    |
| <b>TS<sub>C</sub> R<sub>1</sub> + NCS</b>          | <b>TS<sub>C</sub></b> | -1926.763535       | <b>22.10</b> | 0.345977                 | 0.284442             | -1928.241138             | <b>16.90</b> | -1927.895162                     | <b>-14.17</b>    | -1927.956697              | <b>-1</b> | <b>-1.09</b>       |
|                                                    |                       |                    | -            |                          |                      |                          | -            |                                  |                  |                           |           |                    |
| <b>Cpl [ 2 S<sup>•</sup> ]</b>                     |                       | -1926.800262       | <b>45.15</b> | 0.347683                 | 0.288386             | -1928.275956             | <b>38.75</b> | -1927.928273                     | <b>-34.94</b>    | -1927.987570              | <b>-1</b> | <b>-20.46</b>      |
| Product                                            | <b>2a</b>             | -1567.271724       |              | 0.269461                 | 0.221962             | -1568.361033             |              | -1568.091572                     |                  | -1568.139071              |           |                    |
| De-H <sup>+</sup> -Succinim. Rad. S <sup>•</sup>   |                       | -359.515755        |              | 0.076249                 | 0.045197             | -359.906132              |              | -359.829883                      |                  | -359.860935               |           |                    |
|                                                    |                       |                    | -            |                          |                      |                          | -            |                                  |                  |                           |           |                    |
| <b>2a + S<sup>•</sup></b>                          |                       | -1926.787480       | <b>37.12</b> | 0.345711                 | 0.267160             | -1928.267165             | <b>33.24</b> | -1927.921455                     | <b>-30.67</b>    | -1928.000006              | <b>0</b>  | <b>-26.37</b>      |
| <i>N</i> -ChloroAllene                             | <b>3a</b>             | -1567.173516       |              | 0.264483                 | 0.213056             | -1568.270206             |              | -1568.005722                     |                  | -1568.057149              |           |                    |
| <b>R<sub>1</sub> + 3a</b>                          |                       | -2674.309587       | <b>0.00</b>  | 0.529122                 | 0.430752             | -2676.350498             | <b>0.00</b>  | -2675.821376                     | <b>0.00</b>      | -2675.919746              | <b>0</b>  | <b>0.00</b>        |
| <b>Cpl [ R<sub>1</sub> 3a ]</b>                    |                       | -2674.319521       | <b>-6.23</b> | 0.530613                 | 0.452878             | -2676.357901             | <b>-4.65</b> | -2673.788908                     | <b>-4.65</b>     | -2675.905023              | <b>-1</b> | <b>7.34</b>        |
| <b>TS<sub>D</sub> R<sub>1</sub> + 3a</b>           | <b>TS<sub>D</sub></b> | -2674.316791       | <b>-4.52</b> | 0.529530                 | 0.451780             | -2676.355352             | <b>-3.05</b> | -2673.787261                     | <b>-3.05</b>     | -2675.903571              | <b>-1</b> | <b>8.26</b>        |

|                     |              |              |          |          |              |              |              |               |              |           |               |
|---------------------|--------------|--------------|----------|----------|--------------|--------------|--------------|---------------|--------------|-----------|---------------|
| <b>Cpl [ 2 1' ]</b> | -2674.382561 | <b>45.79</b> | 0.531456 | 0.453750 | -2676.420184 | <b>43.73</b> | -2673.851105 | <b>-43.73</b> | -2675.966434 | <b>-1</b> | <b>-31.19</b> |
| <b>2 + 1'</b>       | -2674.374727 | <b>40.88</b> | 0.529716 | 0.429976 | -2676.413988 | <b>39.84</b> | -2675.884272 | <b>-39.84</b> | -2675.984012 | <b>0</b>  | <b>-40.33</b> |

---

<sup>a</sup> M06/def2-SVP; <sup>b</sup> M06/def2-TZVP; <sup>c</sup> M06/def2-TZVP enegies combined with thermal corrections M06/def2-SVP.

§ 4 Pictures and Cartesian coordinates of optimized structures M06/def2-TZVP.

1a (Table S-1a)

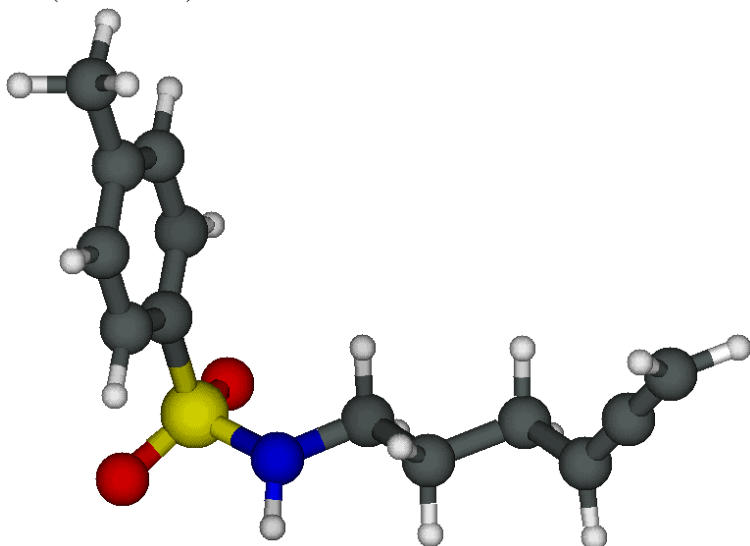


---

|    |    |   |           |           |           |
|----|----|---|-----------|-----------|-----------|
| 1  | 7  | 0 | -0.031275 | 0.001176  | 0.001970  |
| 2  | 6  | 0 | -0.016092 | 0.011104  | 1.457830  |
| 3  | 6  | 0 | 1.406896  | -0.009253 | 1.964589  |
| 4  | 1  | 0 | -0.555906 | 0.877611  | 1.860446  |
| 5  | 1  | 0 | -0.548162 | -0.881964 | 1.805196  |
| 6  | 6  | 0 | 1.466531  | 0.001879  | 3.482572  |
| 7  | 1  | 0 | 1.921183  | -0.893833 | 1.575346  |
| 8  | 1  | 0 | 1.946218  | 0.861694  | 1.570792  |
| 9  | 6  | 0 | 2.874625  | 0.037106  | 3.990162  |
| 10 | 1  | 0 | 0.925699  | 0.880641  | 3.855468  |
| 11 | 1  | 0 | 0.951437  | -0.876180 | 3.883699  |
| 12 | 6  | 0 | 3.415345  | -0.866007 | 4.751902  |
| 13 | 1  | 0 | 3.485653  | 0.883761  | 3.676673  |
| 14 | 6  | 0 | 3.947876  | -1.768459 | 5.517278  |
| 15 | 1  | 0 | 3.908319  | -1.691058 | 6.599991  |
| 16 | 1  | 0 | 4.456625  | -2.635514 | 5.106048  |
| 17 | 16 | 0 | -1.452465 | -0.226334 | -0.783432 |
| 18 | 1  | 0 | 0.516685  | 0.722717  | -0.453454 |
| 19 | 6  | 0 | -1.659836 | -1.974227 | -0.680925 |
| 20 | 8  | 0 | -2.537216 | 0.376696  | -0.067099 |
| 21 | 8  | 0 | -1.196759 | 0.145854  | -2.142427 |
| 22 | 6  | 0 | -2.691167 | -2.509391 | 0.067815  |
| 23 | 6  | 0 | -2.847280 | -3.884951 | 0.122749  |
| 24 | 6  | 0 | -1.986380 | -4.730789 | -0.561672 |
| 25 | 6  | 0 | -0.952933 | -4.166360 | -1.310105 |
| 26 | 6  | 0 | -0.783948 | -2.800944 | -1.373216 |
| 27 | 1  | 0 | -3.367467 | -1.849614 | 0.597464  |
| 28 | 1  | 0 | -3.656704 | -4.308760 | 0.707838  |
| 29 | 6  | 0 | -2.148318 | -6.213069 | -0.511593 |
| 30 | 1  | 0 | -0.274498 | -4.818786 | -1.850970 |
| 31 | 1  | 0 | 0.020342  | -2.368026 | -1.957390 |
| 32 | 1  | 0 | -2.990135 | -6.506614 | 0.116357  |
| 33 | 1  | 0 | -2.313595 | -6.622972 | -1.511447 |
| 34 | 1  | 0 | -1.248672 | -6.693408 | -0.118043 |

---



**K<sub>2</sub>CO<sub>3</sub>** (Table S-1a)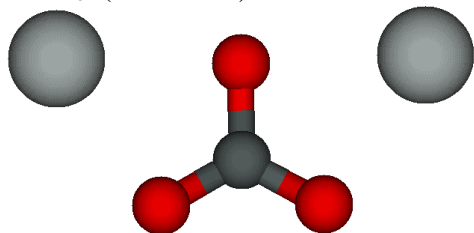

---

|   |    |   |           |           |           |
|---|----|---|-----------|-----------|-----------|
| 1 | 6  | 0 | -0.000305 | -0.000281 | 0.008538  |
| 2 | 8  | 0 | -0.000746 | -0.000507 | 1.329558  |
| 3 | 8  | 0 | 1.114533  | -0.018181 | -0.606474 |
| 4 | 8  | 0 | -1.114684 | 0.018117  | -0.607145 |
| 5 | 19 | 0 | 2.519308  | -0.067382 | 1.418695  |
| 6 | 19 | 0 | -2.519761 | 0.066271  | 1.416953  |

---

**KHCO<sub>3</sub>** (Table S-1a)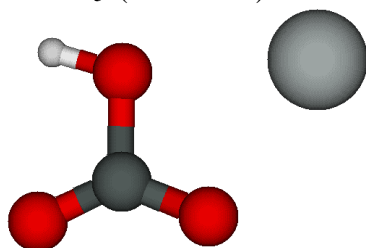

---

|   |    |   |           |           |           |
|---|----|---|-----------|-----------|-----------|
| 1 | 6  | 0 | 0.000156  | -0.000177 | 0.001881  |
| 2 | 8  | 0 | -0.001972 | -0.000679 | 1.442384  |
| 3 | 8  | 0 | 1.155818  | 0.000585  | -0.451329 |
| 4 | 8  | 0 | -1.099491 | -0.000524 | -0.521021 |
| 5 | 19 | 0 | 2.593795  | 0.002842  | 1.608746  |
| 6 | 1  | 0 | -0.931444 | -0.001376 | 1.694805  |

---

**K<sup>+</sup>1<sup>-</sup>** (Table S-1a)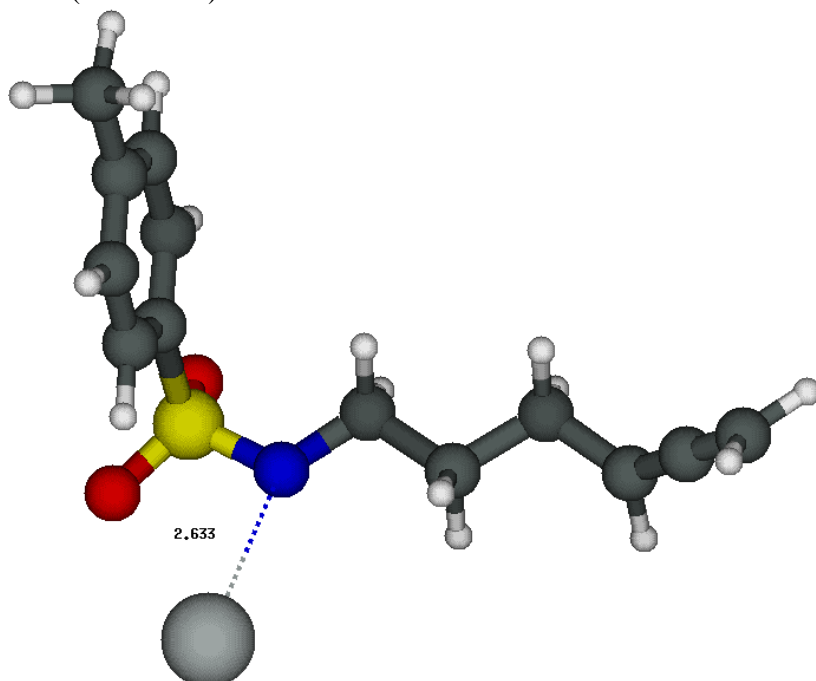

|    |    |   |           |           |           |
|----|----|---|-----------|-----------|-----------|
| 1  | 7  | 0 | 0.002114  | -0.072333 | -0.004618 |
| 2  | 6  | 0 | -0.000616 | -0.063369 | 1.443339  |
| 3  | 6  | 0 | 1.420425  | -0.032387 | 1.962228  |
| 4  | 1  | 0 | -0.546783 | 0.803684  | 1.847036  |
| 5  | 1  | 0 | -0.504241 | -0.956500 | 1.856008  |
| 6  | 6  | 0 | 1.491232  | -0.053993 | 3.479716  |
| 7  | 1  | 0 | 1.973717  | -0.888409 | 1.557049  |
| 8  | 1  | 0 | 1.919541  | 0.868756  | 1.582365  |
| 9  | 6  | 0 | 2.897310  | 0.050713  | 3.983740  |
| 10 | 1  | 0 | 0.903888  | 0.784135  | 3.875558  |
| 11 | 1  | 0 | 1.028712  | -0.968237 | 3.863736  |
| 12 | 6  | 0 | 3.502444  | -0.841015 | 4.709755  |
| 13 | 1  | 0 | 3.452433  | 0.944336  | 3.696718  |
| 14 | 6  | 0 | 4.097808  | -1.733807 | 5.440483  |
| 15 | 1  | 0 | 4.062935  | -1.696312 | 6.525606  |
| 16 | 1  | 0 | 4.654848  | -2.554291 | 4.997213  |
| 17 | 16 | 0 | -1.391706 | 0.005865  | -0.694429 |
| 18 | 6  | 0 | -2.229667 | -1.539354 | -0.381519 |
| 19 | 8  | 0 | -2.283027 | 1.025803  | -0.190385 |
| 20 | 8  | 0 | -1.143754 | 0.034175  | -2.136282 |
| 21 | 6  | 0 | -3.314561 | -1.592314 | 0.473872  |
| 22 | 6  | 0 | -3.918985 | -2.809647 | 0.751724  |
| 23 | 6  | 0 | -3.455443 | -3.986651 | 0.183852  |
| 24 | 6  | 0 | -2.358331 | -3.916349 | -0.673936 |
| 25 | 6  | 0 | -1.747896 | -2.711226 | -0.950881 |
| 26 | 1  | 0 | -3.686408 | -0.674066 | 0.912627  |
| 27 | 1  | 0 | -4.772062 | -2.843576 | 1.422386  |
| 28 | 6  | 0 | -4.104750 | -5.301085 | 0.468448  |
| 29 | 1  | 0 | -1.983705 | -4.829237 | -1.128344 |
| 30 | 1  | 0 | -0.894619 | -2.670867 | -1.619719 |
| 31 | 1  | 0 | -4.514780 | -5.744815 | -0.443104 |
| 32 | 1  | 0 | -3.386673 | -6.018698 | 0.874378  |
| 33 | 1  | 0 | -4.920153 | -5.199577 | 1.185996  |
| 34 | 19 | 0 | 1.436742  | 0.195969  | -2.196508 |

NCS (Table S-1b)

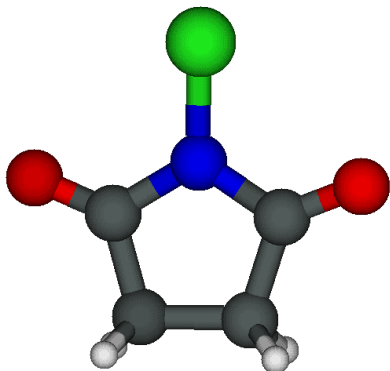

|   |   |   |           |           |           |
|---|---|---|-----------|-----------|-----------|
| 1 | 6 | 0 | 0.001667  | 0.000008  | 0.001497  |
| 2 | 6 | 0 | 0.001755  | 0.000027  | 1.522887  |
| 3 | 6 | 0 | 1.445787  | 0.000068  | -0.421518 |
| 4 | 1 | 0 | -0.481486 | -0.876412 | -0.433597 |
| 5 | 1 | 0 | -0.481479 | 0.876452  | -0.433567 |
| 6 | 6 | 0 | 1.445927  | 0.000464  | 1.945737  |
| 7 | 1 | 0 | -0.481650 | 0.876279  | 1.958039  |

|    |    |   |           |           |           |
|----|----|---|-----------|-----------|-----------|
| 8  | 1  | 0 | -0.481037 | -0.876583 | 1.958007  |
| 9  | 8  | 0 | 1.906584  | -0.000134 | -1.522401 |
| 10 | 7  | 0 | 2.192534  | 0.000478  | 0.762064  |
| 11 | 8  | 0 | 1.906855  | 0.000724  | 3.046564  |
| 12 | 17 | 0 | 3.868903  | 0.000717  | 0.761964  |

---

**TS<sub>Cl-Exc</sub>** (Table S-1b) Imaginary frequency: 173 cm<sup>-1</sup>.

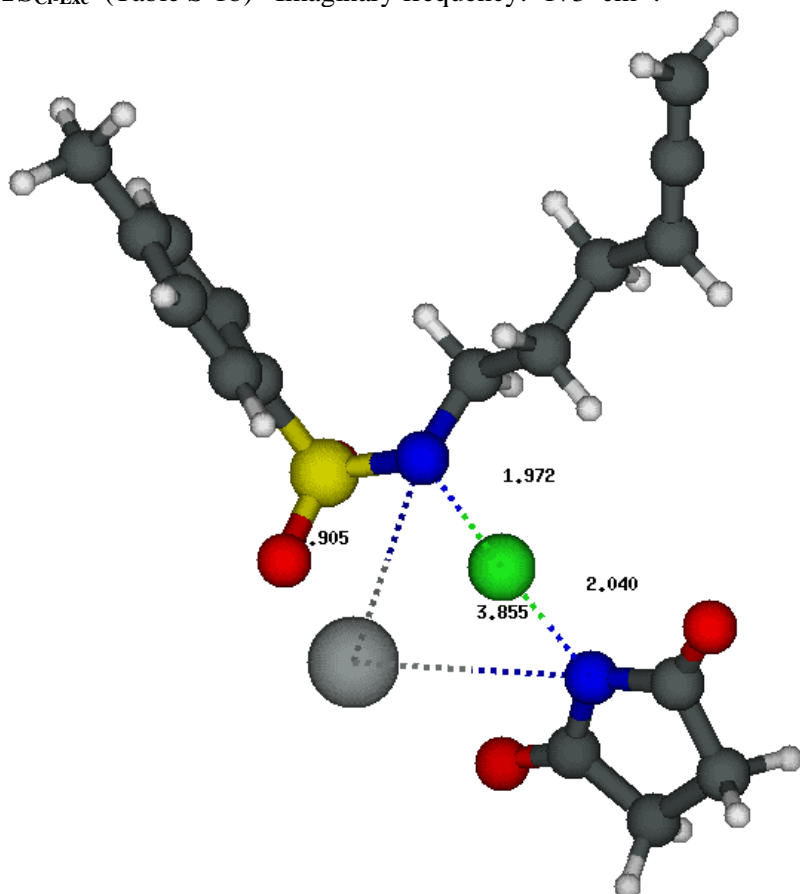


---

|    |    |   |           |           |           |
|----|----|---|-----------|-----------|-----------|
| 1  | 7  | 0 | -0.081678 | 0.027397  | -0.004905 |
| 2  | 6  | 0 | -0.059048 | 0.024995  | 1.456249  |
| 3  | 6  | 0 | 1.365839  | -0.004553 | 1.960024  |
| 4  | 1  | 0 | -0.591058 | 0.902815  | 1.851211  |
| 5  | 1  | 0 | -0.593382 | -0.858381 | 1.831129  |
| 6  | 6  | 0 | 1.426039  | 0.042584  | 3.477098  |
| 7  | 1  | 0 | 1.856574  | -0.911867 | 1.590829  |
| 8  | 1  | 0 | 1.920454  | 0.842278  | 1.541357  |
| 9  | 6  | 0 | 2.834493  | 0.048230  | 3.984655  |
| 10 | 1  | 0 | 0.916473  | 0.950610  | 3.824057  |
| 11 | 1  | 0 | 0.882486  | -0.805189 | 3.906556  |
| 12 | 6  | 0 | 3.337542  | -0.827677 | 4.801581  |
| 13 | 1  | 0 | 3.479151  | 0.847354  | 3.618361  |
| 14 | 6  | 0 | 3.832976  | -1.703658 | 5.621850  |
| 15 | 1  | 0 | 3.798546  | -1.558978 | 6.697973  |
| 16 | 1  | 0 | 4.306039  | -2.614166 | 5.265235  |
| 17 | 16 | 0 | -1.455580 | -0.462833 | -0.679864 |
| 18 | 6  | 0 | -1.561331 | -2.165349 | -0.237796 |
| 19 | 8  | 0 | -2.629367 | 0.213203  | -0.156456 |
| 20 | 8  | 0 | -1.302506 | -0.360362 | -2.113375 |
| 21 | 6  | 0 | -2.617830 | -2.628150 | 0.523970  |

|    |    |   |           |           |           |
|----|----|---|-----------|-----------|-----------|
| 22 | 6  | 0 | -2.680586 | -3.973695 | 0.847044  |
| 23 | 6  | 0 | -1.699307 | -4.858790 | 0.422364  |
| 24 | 6  | 0 | -0.641001 | -4.365027 | -0.340391 |
| 25 | 6  | 0 | -0.563625 | -3.029721 | -0.671167 |
| 26 | 1  | 0 | -3.381642 | -1.936892 | 0.858892  |
| 27 | 1  | 0 | -3.508241 | -4.343213 | 1.443471  |
| 28 | 6  | 0 | -1.758201 | -6.308911 | 0.768301  |
| 29 | 1  | 0 | 0.133101  | -5.048031 | -0.676057 |
| 30 | 1  | 0 | 0.262977  | -2.649012 | -1.260527 |
| 31 | 1  | 0 | -0.876292 | -6.612079 | 1.338698  |
| 32 | 1  | 0 | -2.641783 | -6.546921 | 1.361367  |
| 33 | 1  | 0 | -1.778994 | -6.926809 | -0.133201 |
| 34 | 17 | 0 | 0.343154  | 1.846821  | -0.635973 |
| 35 | 7  | 0 | 0.834567  | 3.743104  | -1.204316 |
| 36 | 6  | 0 | 2.003074  | 4.358535  | -0.813864 |
| 37 | 8  | 0 | 2.845505  | 3.877257  | -0.099195 |
| 38 | 6  | 0 | 2.050908  | 5.745056  | -1.430912 |
| 39 | 6  | 0 | 0.757619  | 5.857594  | -2.213705 |
| 40 | 1  | 0 | 2.150264  | 6.482087  | -0.632370 |
| 41 | 1  | 0 | 2.948043  | 5.822550  | -2.047364 |
| 42 | 6  | 0 | 0.070484  | 4.528875  | -1.990049 |
| 43 | 1  | 0 | 0.098607  | 6.657354  | -1.870240 |
| 44 | 1  | 0 | 0.898756  | 6.003851  | -3.286350 |
| 45 | 8  | 0 | -1.019991 | 4.228603  | -2.458841 |
| 46 | 19 | 0 | -2.501174 | 2.116624  | -2.247007 |

---

**3a** (Table S-1b)

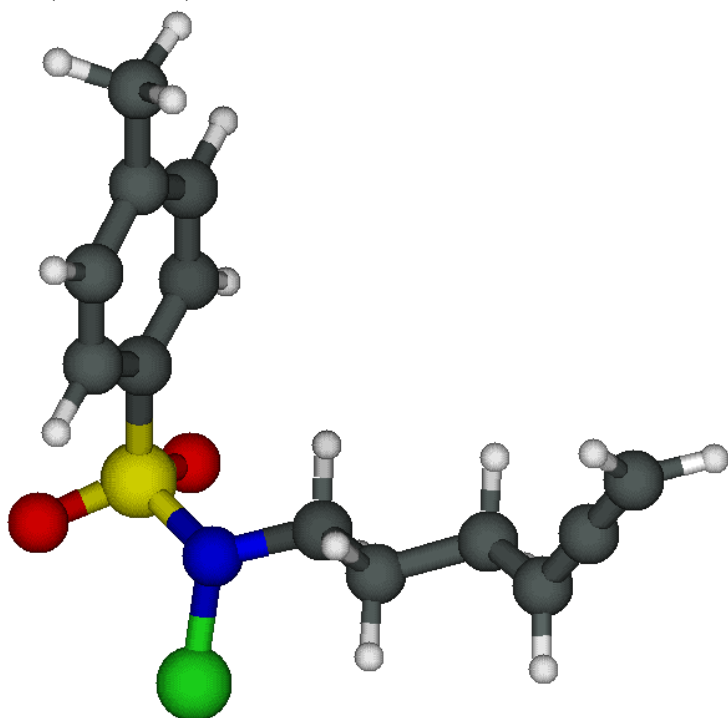


---

|   |   |   |           |           |           |
|---|---|---|-----------|-----------|-----------|
| 1 | 7 | 0 | -0.042645 | 0.009383  | -0.002868 |
| 2 | 6 | 0 | -0.023043 | 0.010057  | 1.465541  |
| 3 | 6 | 0 | 1.388597  | -0.014399 | 2.000237  |
| 4 | 1 | 0 | -0.591031 | 0.863158  | 1.858118  |
| 5 | 1 | 0 | -0.546941 | -0.899202 | 1.778892  |
| 6 | 6 | 0 | 1.398301  | -0.079778 | 3.519046  |

|    |    |   |           |           |           |
|----|----|---|-----------|-----------|-----------|
| 7  | 1  | 0 | 1.916700  | -0.878100 | 1.582996  |
| 8  | 1  | 0 | 1.930349  | 0.877257  | 1.667969  |
| 9  | 6  | 0 | 2.789537  | -0.063509 | 4.071712  |
| 10 | 1  | 0 | 0.841283  | 0.777644  | 3.917039  |
| 11 | 1  | 0 | 0.876377  | -0.978604 | 3.861509  |
| 12 | 6  | 0 | 3.309280  | -1.001012 | 4.805951  |
| 13 | 1  | 0 | 3.405644  | 0.799203  | 3.818222  |
| 14 | 6  | 0 | 3.820593  | -1.938504 | 5.543218  |
| 15 | 1  | 0 | 3.746229  | -1.914299 | 6.626604  |
| 16 | 1  | 0 | 4.346664  | -2.782540 | 5.106637  |
| 17 | 16 | 0 | -1.530463 | -0.476513 | -0.688978 |
| 18 | 17 | 0 | 0.405931  | 1.558660  | -0.628758 |
| 19 | 6  | 0 | -1.460171 | -2.190664 | -0.309529 |
| 20 | 8  | 0 | -2.624544 | 0.119455  | 0.014119  |
| 21 | 8  | 0 | -1.393396 | -0.287849 | -2.095170 |
| 22 | 6  | 0 | -2.385527 | -2.741557 | 0.558969  |
| 23 | 6  | 0 | -2.344487 | -4.101640 | 0.810968  |
| 24 | 6  | 0 | -1.389226 | -4.912515 | 0.211968  |
| 25 | 6  | 0 | -0.465636 | -4.329586 | -0.655901 |
| 26 | 6  | 0 | -0.494458 | -2.978732 | -0.923234 |
| 27 | 1  | 0 | -3.130889 | -2.108476 | 1.025225  |
| 28 | 1  | 0 | -3.069655 | -4.543204 | 1.486082  |
| 29 | 6  | 0 | -1.340340 | -6.379203 | 0.476830  |
| 30 | 1  | 0 | 0.283774  | -4.955660 | -1.129572 |
| 31 | 1  | 0 | 0.220315  | -2.529898 | -1.603225 |
| 32 | 1  | 0 | -2.108343 | -6.688092 | 1.186356  |
| 33 | 1  | 0 | -1.484362 | -6.946713 | -0.446284 |
| 34 | 1  | 0 | -0.367420 | -6.672520 | 0.879327  |

---

**K<sup>+</sup>S<sup>-</sup>** (Table S-1b)

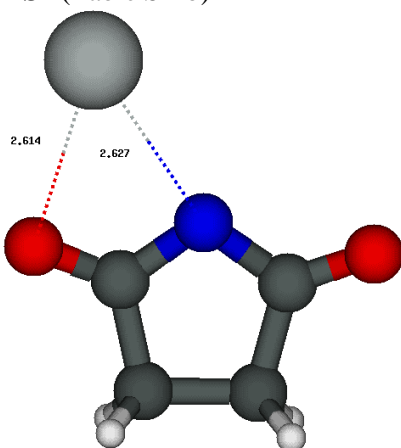

|    |    |   |           |           |           |
|----|----|---|-----------|-----------|-----------|
| 1  | 6  | 0 | -0.001117 | -0.001046 | 0.001794  |
| 2  | 6  | 0 | 0.001776  | 0.000525  | 1.514616  |
| 3  | 6  | 0 | 1.479848  | 0.001364  | -0.365625 |
| 4  | 1  | 0 | -0.477590 | -0.876948 | -0.442947 |
| 5  | 1  | 0 | -0.477808 | 0.875002  | -0.442772 |
| 6  | 6  | 0 | 1.478916  | 0.013997  | 1.854187  |
| 7  | 1  | 0 | -0.479481 | 0.871577  | 1.964894  |
| 8  | 1  | 0 | -0.461687 | -0.880247 | 1.964881  |
| 9  | 8  | 0 | 1.885908  | -0.005160 | -1.510076 |
| 10 | 7  | 0 | 2.259610  | 0.012403  | 0.757545  |
| 11 | 8  | 0 | 1.910174  | 0.025487  | 3.013721  |
| 12 | 19 | 0 | 4.413527  | 0.055315  | 2.261291  |

-----  
**TS<sub>Cl-Exc</sub>** (Table S-1c) Imaginary frequency: 374 cm<sup>-1</sup>.

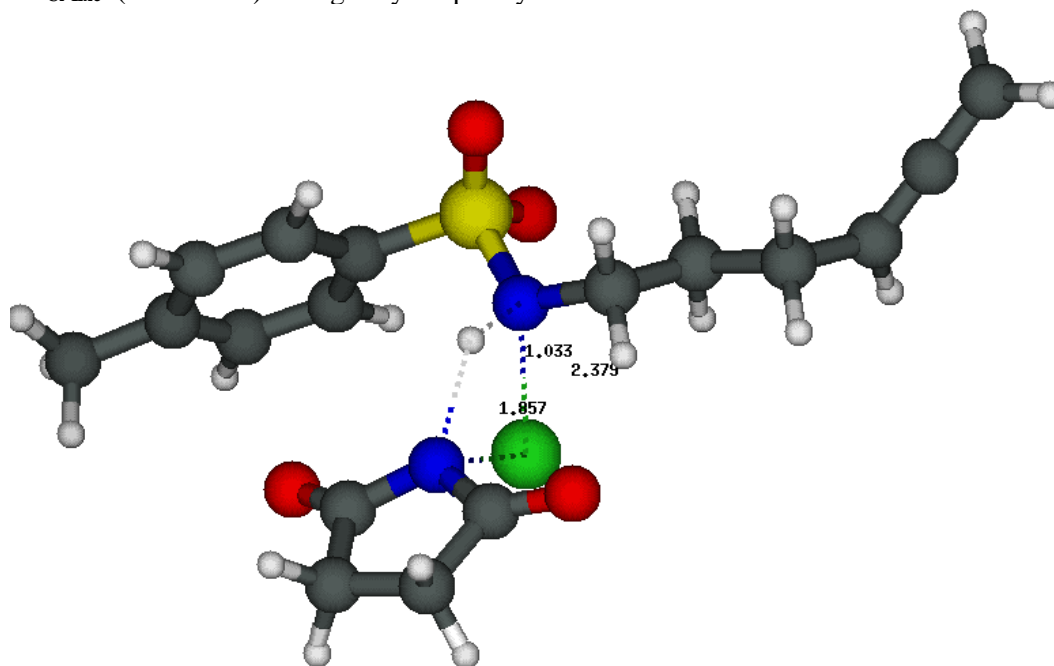

-----

|    |    |   |           |           |           |
|----|----|---|-----------|-----------|-----------|
| 1  | 7  | 0 | 0.021296  | 0.010535  | -0.019039 |
| 2  | 6  | 0 | 0.025852  | -0.005661 | 1.363615  |
| 3  | 6  | 0 | 1.465404  | -0.009485 | 1.847090  |
| 4  | 6  | 0 | 2.296415  | -0.120549 | 0.583101  |
| 5  | 6  | 0 | 1.280333  | -0.175475 | -0.543513 |
| 6  | 8  | 0 | -0.948100 | -0.001892 | 2.071573  |
| 7  | 1  | 0 | 1.647123  | 0.903960  | 2.415850  |
| 8  | 1  | 0 | 1.592470  | -0.844501 | 2.538426  |
| 9  | 1  | 0 | 2.963079  | 0.726417  | 0.413154  |
| 10 | 1  | 0 | 2.909207  | -1.022400 | 0.530201  |
| 11 | 8  | 0 | 1.548156  | -0.338280 | -1.709829 |
| 12 | 1  | 0 | -1.286157 | 0.746815  | -1.113257 |
| 13 | 7  | 0 | -1.909308 | 0.472670  | -1.890405 |
| 14 | 16 | 0 | -3.521157 | 1.029238  | -1.723234 |
| 15 | 6  | 0 | -3.630567 | 1.187535  | 0.007322  |
| 16 | 8  | 0 | -3.541759 | 2.315589  | -2.348388 |
| 17 | 8  | 0 | -4.367617 | -0.013767 | -2.194226 |
| 18 | 6  | 0 | -1.271842 | 0.498658  | -3.193246 |
| 19 | 6  | 0 | -1.996330 | -0.295233 | -4.258235 |
| 20 | 1  | 0 | -1.168625 | 1.549174  | -3.504595 |
| 21 | 1  | 0 | -0.255752 | 0.118365  | -3.022135 |
| 22 | 17 | 0 | -1.563574 | -1.655651 | -0.885527 |
| 23 | 6  | 0 | -3.155730 | 2.343769  | 0.612194  |
| 24 | 6  | 0 | -3.232403 | 2.456523  | 1.983664  |
| 25 | 6  | 0 | -3.774527 | 1.434035  | 2.757512  |
| 26 | 6  | 0 | -4.259986 | 0.296008  | 2.122365  |
| 27 | 6  | 0 | -4.185326 | 0.158161  | 0.752736  |
| 28 | 1  | 0 | -2.743810 | 3.145426  | 0.010184  |
| 29 | 1  | 0 | -2.864381 | 3.353514  | 2.470122  |
| 30 | 6  | 0 | -3.792891 | 1.536459  | 4.243403  |
| 31 | 1  | 0 | -4.690736 | -0.501626 | 2.717778  |
| 32 | 1  | 0 | -4.552153 | -0.732907 | 0.259120  |
| 33 | 1  | 0 | -4.637579 | 0.997087  | 4.674799  |

|    |   |   |           |           |           |
|----|---|---|-----------|-----------|-----------|
| 34 | 1 | 0 | -2.880886 | 1.095452  | 4.657996  |
| 35 | 1 | 0 | -3.833821 | 2.574294  | 4.577503  |
| 36 | 6 | 0 | -1.170482 | -0.338761 | -5.534277 |
| 37 | 1 | 0 | -2.178263 | -1.310028 | -3.890585 |
| 38 | 1 | 0 | -2.975639 | 0.141869  | -4.472130 |
| 39 | 6 | 0 | -1.841768 | -1.146837 | -6.600847 |
| 40 | 1 | 0 | -0.988852 | 0.676755  | -5.899496 |
| 41 | 1 | 0 | -0.189407 | -0.775072 | -5.310435 |
| 42 | 6 | 0 | -2.211012 | -0.688334 | -7.759062 |
| 43 | 1 | 0 | -2.044713 | -2.191721 | -6.366509 |
| 44 | 6 | 0 | -2.573606 | -0.225463 | -8.915787 |
| 45 | 1 | 0 | -3.556383 | 0.210366  | -9.070632 |
| 46 | 1 | 0 | -1.910013 | -0.257813 | -9.775113 |

---

**SH** (Table S-1c)

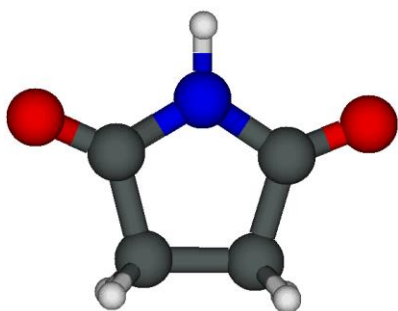

|    |   |   |           |           |           |
|----|---|---|-----------|-----------|-----------|
| 1  | 6 | 0 | 0.001099  | 0.000365  | 0.001378  |
| 2  | 6 | 0 | 0.001083  | 0.000399  | 1.521857  |
| 3  | 6 | 0 | 1.455587  | 0.000165  | -0.403126 |
| 4  | 1 | 0 | -0.480242 | -0.875219 | -0.436828 |
| 5  | 1 | 0 | -0.479958 | 0.876034  | -0.436944 |
| 6  | 6 | 0 | 1.455564  | 0.000313  | 1.926395  |
| 7  | 1 | 0 | -0.480049 | 0.876043  | 1.960144  |
| 8  | 1 | 0 | -0.480197 | -0.875210 | 1.960085  |
| 9  | 8 | 0 | 1.910120  | -0.000727 | -1.513130 |
| 10 | 7 | 0 | 2.200837  | -0.000358 | 0.761643  |
| 11 | 8 | 0 | 1.910068  | -0.000496 | 3.036411  |
| 12 | 1 | 0 | 3.211651  | -0.001047 | 0.761642  |

---

**1a'** (Table S-2a)

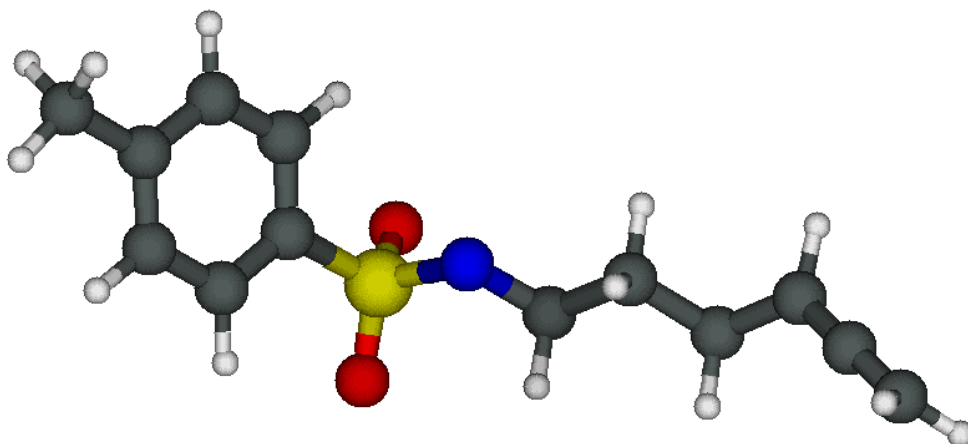

---

|    |    |   |           |           |           |
|----|----|---|-----------|-----------|-----------|
| 1  | 7  | 0 | -0.024462 | 0.083148  | -0.005101 |
| 2  | 6  | 0 | -0.025060 | 0.086567  | 1.426113  |
| 3  | 6  | 0 | 1.380230  | 0.021096  | 1.977585  |
| 4  | 1  | 0 | -0.536992 | 1.001976  | 1.769375  |
| 5  | 1  | 0 | -0.644540 | -0.739128 | 1.814454  |
| 6  | 6  | 0 | 1.388675  | 0.058387  | 3.496009  |
| 7  | 1  | 0 | 1.862812  | -0.895466 | 1.622363  |
| 8  | 1  | 0 | 1.965112  | 0.855159  | 1.577463  |
| 9  | 6  | 0 | 2.772595  | -0.064515 | 4.053647  |
| 10 | 1  | 0 | 0.927646  | 0.984586  | 3.852844  |
| 11 | 1  | 0 | 0.771223  | -0.765090 | 3.877283  |
| 12 | 16 | 0 | -1.521216 | -0.107775 | -0.687259 |
| 13 | 6  | 0 | -1.185070 | 0.273802  | -2.365545 |
| 14 | 8  | 0 | -1.822984 | -1.505880 | -0.566602 |
| 15 | 8  | 0 | -2.432505 | 0.863936  | -0.159299 |
| 16 | 6  | 0 | 3.350796  | 0.816786  | 4.813353  |
| 17 | 1  | 0 | 3.330801  | -0.960216 | 3.780813  |
| 18 | 6  | 0 | 3.920910  | 1.698575  | 5.575721  |
| 19 | 1  | 0 | 4.504414  | 2.516139  | 5.162376  |
| 20 | 1  | 0 | 3.839259  | 1.652517  | 6.657868  |
| 21 | 6  | 0 | -0.429870 | -0.611261 | -3.124029 |
| 22 | 6  | 0 | -0.173123 | -0.313127 | -4.443897 |
| 23 | 6  | 0 | -0.662104 | 0.856087  | -5.026672 |
| 24 | 6  | 0 | -1.415798 | 1.722577  | -4.246831 |
| 25 | 6  | 0 | -1.679364 | 1.440996  | -2.917546 |
| 26 | 1  | 0 | -0.051390 | -1.523473 | -2.677392 |
| 27 | 1  | 0 | 0.416506  | -0.997667 | -5.045436 |
| 28 | 6  | 0 | -0.376947 | 1.150736  | -6.460825 |
| 29 | 1  | 0 | -1.804242 | 2.634488  | -4.687667 |
| 30 | 1  | 0 | -2.269000 | 2.117031  | -2.310921 |
| 31 | 1  | 0 | 0.698773  | 1.157370  | -6.653971 |
| 32 | 1  | 0 | -0.810030 | 0.385241  | -7.110259 |
| 33 | 1  | 0 | -0.781912 | 2.116865  | -6.763353 |

---

**<sup>13</sup>a\*** (Table S-2b)

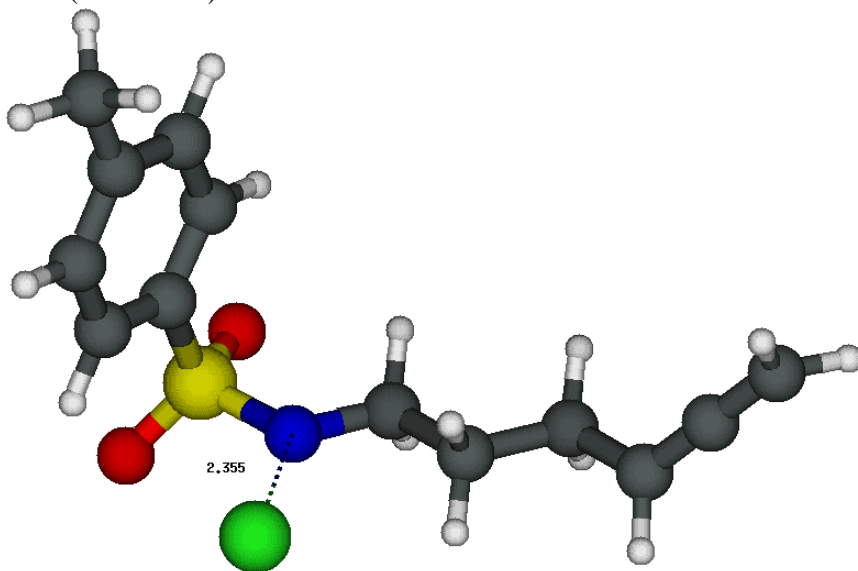


---

|   |   |   |           |          |           |
|---|---|---|-----------|----------|-----------|
| 1 | 7 | 0 | -0.020562 | 0.025347 | -0.007424 |
| 2 | 6 | 0 | -0.012151 | 0.018175 | 1.417290  |

---



|    |    |   |           |           |           |
|----|----|---|-----------|-----------|-----------|
| 3  | 6  | 0 | 1.370582  | -0.004786 | 2.017170  |
| 4  | 1  | 0 | -0.574034 | 0.906090  | 1.765581  |
| 5  | 1  | 0 | -0.620352 | -0.823531 | 1.789006  |
| 6  | 6  | 0 | 1.304851  | 0.023904  | 3.535325  |
| 7  | 1  | 0 | 1.903725  | -0.898173 | 1.678349  |
| 8  | 1  | 0 | 1.942866  | 0.850910  | 1.647845  |
| 9  | 6  | 0 | 2.668182  | 0.033822  | 4.153530  |
| 10 | 1  | 0 | 0.758417  | 0.921370  | 3.852742  |
| 11 | 1  | 0 | 0.737204  | -0.834322 | 3.908682  |
| 12 | 6  | 0 | 3.106592  | -0.845479 | 5.003363  |
| 13 | 1  | 0 | 3.337508  | 0.836842  | 3.845244  |
| 14 | 6  | 0 | 3.542880  | -1.725073 | 5.851663  |
| 15 | 1  | 0 | 3.423520  | -1.590142 | 6.922776  |
| 16 | 1  | 0 | 4.039882  | -2.633667 | 5.524422  |
| 17 | 16 | 0 | -1.415789 | -0.133879 | -0.856027 |
| 18 | 17 | 0 | 1.996113  | 0.130919  | -1.219709 |
| 19 | 6  | 0 | -1.169567 | -1.793573 | -1.333995 |
| 20 | 8  | 0 | -2.529296 | -0.057082 | 0.041716  |
| 21 | 8  | 0 | -1.349729 | 0.712238  | -1.998742 |
| 22 | 6  | 0 | -1.669160 | -2.823512 | -0.533749 |
| 23 | 6  | 0 | -1.465491 | -4.126061 | -0.916428 |
| 24 | 6  | 0 | -0.752092 | -4.430613 | -2.081017 |
| 25 | 6  | 0 | -0.254057 | -3.384565 | -2.860900 |
| 26 | 6  | 0 | -0.444385 | -2.074547 | -2.493121 |
| 27 | 1  | 0 | -2.232605 | -2.584977 | 0.360174  |
| 28 | 1  | 0 | -1.865424 | -4.935568 | -0.315600 |
| 29 | 6  | 0 | -0.506952 | -5.845405 | -2.460591 |
| 30 | 1  | 0 | 0.290491  | -3.615127 | -3.769619 |
| 31 | 1  | 0 | -0.054979 | -1.261034 | -3.091814 |
| 32 | 1  | 0 | -0.289450 | -5.947254 | -3.524105 |
| 33 | 1  | 0 | 0.355554  | -6.238662 | -1.912235 |
| 34 | 1  | 0 | -1.358291 | -6.480361 | -2.209057 |

---

**<sup>33</sup>a\*** (Table S-2c)

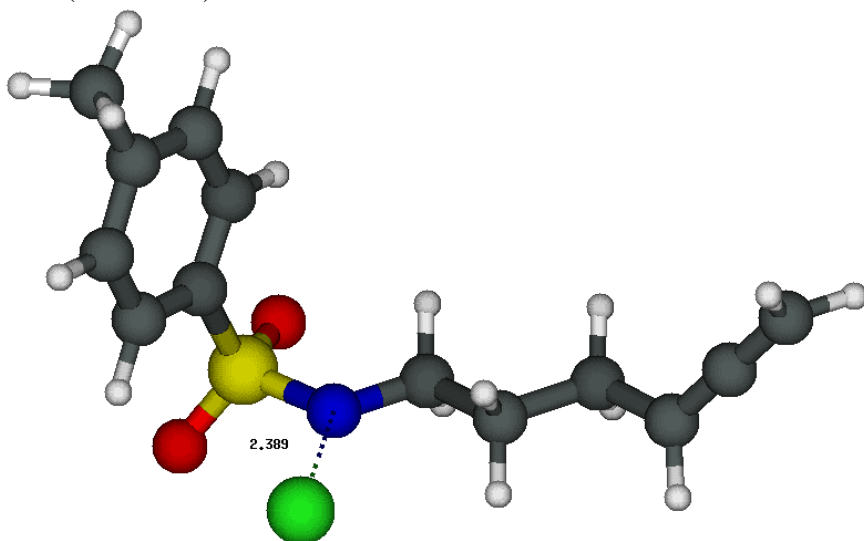

|   |   |   |           |           |           |
|---|---|---|-----------|-----------|-----------|
| 1 | 7 | 0 | -0.115724 | 0.336617  | -0.123170 |
| 2 | 6 | 0 | -0.111902 | 0.108808  | 1.279432  |
| 3 | 6 | 0 | 1.274139  | 0.056046  | 1.879031  |
| 4 | 1 | 0 | -0.718246 | 0.899713  | 1.754276  |
| 5 | 1 | 0 | -0.669761 | -0.820700 | 1.488401  |

|    |    |   |           |           |           |
|----|----|---|-----------|-----------|-----------|
| 6  | 6  | 0 | 1.205968  | -0.166925 | 3.380615  |
| 7  | 1  | 0 | 1.848615  | -0.743657 | 1.403224  |
| 8  | 1  | 0 | 1.800697  | 0.989052  | 1.657108  |
| 9  | 6  | 0 | 2.567109  | -0.184159 | 4.003517  |
| 10 | 1  | 0 | 0.609780  | 0.634497  | 3.835520  |
| 11 | 1  | 0 | 0.687757  | -1.105485 | 3.601071  |
| 12 | 6  | 0 | 3.065636  | -1.179934 | 4.672832  |
| 13 | 1  | 0 | 3.179470  | 0.706410  | 3.862845  |
| 14 | 6  | 0 | 3.556946  | -2.176073 | 5.343455  |
| 15 | 1  | 0 | 3.428538  | -2.256001 | 6.419057  |
| 16 | 1  | 0 | 4.120061  | -2.966850 | 4.856362  |
| 17 | 16 | 0 | -1.582454 | 0.306318  | -0.968980 |
| 18 | 17 | 0 | 1.892808  | 0.617615  | -1.386093 |
| 19 | 6  | 0 | -1.418510 | -1.269996 | -1.697849 |
| 20 | 8  | 0 | -2.651732 | 0.295848  | -0.019263 |
| 21 | 8  | 0 | -1.490573 | 1.330405  | -1.951959 |
| 22 | 6  | 0 | -1.975289 | -2.375022 | -1.068012 |
| 23 | 6  | 0 | -1.828697 | -3.619584 | -1.646635 |
| 24 | 6  | 0 | -1.130348 | -3.776855 | -2.839880 |
| 25 | 6  | 0 | -0.577249 | -2.650242 | -3.449007 |
| 26 | 6  | 0 | -0.710405 | -1.400224 | -2.888702 |
| 27 | 1  | 0 | -2.530878 | -2.251832 | -0.146003 |
| 28 | 1  | 0 | -2.266971 | -4.488720 | -1.168368 |
| 29 | 6  | 0 | -0.974078 | -5.116767 | -3.472147 |
| 30 | 1  | 0 | -0.032512 | -2.765802 | -4.380253 |
| 31 | 1  | 0 | -0.276994 | -0.525962 | -3.358548 |
| 32 | 1  | 0 | -1.471889 | -5.145777 | -4.445230 |
| 33 | 1  | 0 | 0.079811  | -5.343773 | -3.651071 |
| 34 | 1  | 0 | -1.395191 | -5.909455 | -2.853507 |

TS<sub>Cl-Det</sub> (Table S-2c) Imaginary frequency: 169 cm<sup>-1</sup>.

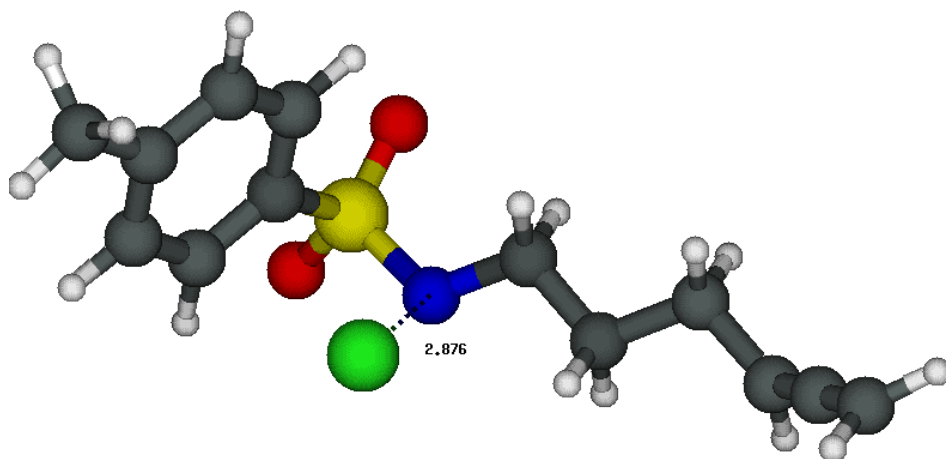

|    |   |   |           |           |           |
|----|---|---|-----------|-----------|-----------|
| 1  | 7 | 0 | -0.019533 | 0.026390  | -0.029552 |
| 2  | 6 | 0 | -0.025128 | -0.033164 | 1.394528  |
| 3  | 6 | 0 | 1.378728  | -0.009008 | 1.956110  |
| 4  | 1 | 0 | -0.640508 | 0.783119  | 1.804280  |
| 5  | 1 | 0 | -0.548785 | -0.956437 | 1.706718  |
| 6  | 6 | 0 | 1.370412  | -0.081864 | 3.473487  |
| 7  | 1 | 0 | 1.950093  | -0.843409 | 1.539247  |
| 8  | 1 | 0 | 1.877786  | 0.907980  | 1.625907  |
| 9  | 6 | 0 | 2.750854  | 0.006219  | 4.045797  |
| 10 | 1 | 0 | 0.761888  | 0.741271  | 3.869638  |

|    |    |   |           |           |           |
|----|----|---|-----------|-----------|-----------|
| 11 | 1  | 0 | 0.893352  | -1.010233 | 3.802709  |
| 12 | 6  | 0 | 3.310075  | -0.904724 | 4.784432  |
| 13 | 1  | 0 | 3.324068  | 0.900731  | 3.802030  |
| 14 | 6  | 0 | 3.861587  | -1.816783 | 5.524527  |
| 15 | 1  | 0 | 3.772698  | -1.801682 | 6.606985  |
| 16 | 1  | 0 | 4.436601  | -2.629763 | 5.090735  |
| 17 | 16 | 0 | -1.483052 | 0.271969  | -0.788484 |
| 18 | 17 | 0 | 0.972480  | -2.600799 | -0.651372 |
| 19 | 6  | 0 | -1.782092 | -1.366044 | -1.350462 |
| 20 | 8  | 0 | -2.504125 | 0.637694  | 0.148060  |
| 21 | 8  | 0 | -1.211005 | 1.109544  | -1.912313 |
| 22 | 6  | 0 | -2.600570 | -2.215539 | -0.612439 |
| 23 | 6  | 0 | -2.872515 | -3.468125 | -1.106547 |
| 24 | 6  | 0 | -2.348598 | -3.896967 | -2.335702 |
| 25 | 6  | 0 | -1.531850 | -3.035616 | -3.053772 |
| 26 | 6  | 0 | -1.228347 | -1.780037 | -2.565938 |
| 27 | 1  | 0 | -3.028956 | -1.876293 | 0.322879  |
| 28 | 1  | 0 | -3.515376 | -4.140445 | -0.547760 |
| 29 | 6  | 0 | -2.674521 | -5.258101 | -2.838097 |
| 30 | 1  | 0 | -1.117389 | -3.357532 | -4.002271 |
| 31 | 1  | 0 | -0.593799 | -1.100586 | -3.122217 |
| 32 | 1  | 0 | -2.217642 | -5.453574 | -3.807833 |
| 33 | 1  | 0 | -2.326856 | -6.020828 | -2.135855 |
| 34 | 1  | 0 | -3.755871 | -5.389116 | -2.933024 |

---

Cpl [Cl<sup>-</sup> 1a<sup>+</sup>] (Table S-2c)

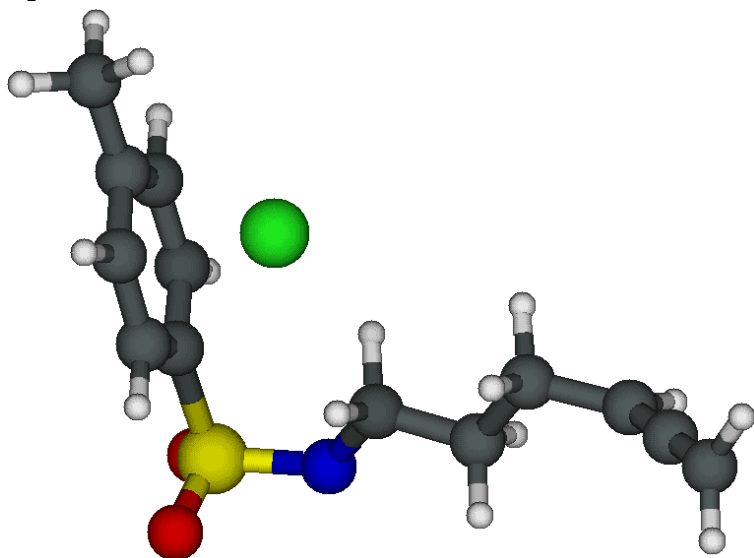


---

|    |   |   |           |           |          |
|----|---|---|-----------|-----------|----------|
| 1  | 7 | 0 | -0.074068 | 0.407971  | 0.165901 |
| 2  | 6 | 0 | -0.038016 | -0.017604 | 1.526127 |
| 3  | 6 | 0 | 1.333346  | 0.164688  | 2.132162 |
| 4  | 1 | 0 | -0.794799 | 0.542159  | 2.105945 |
| 5  | 1 | 0 | -0.371196 | -1.067935 | 1.609557 |
| 6  | 6 | 0 | 1.359814  | -0.279962 | 3.584641 |
| 7  | 1 | 0 | 2.064431  | -0.404587 | 1.550240 |
| 8  | 1 | 0 | 1.624619  | 1.217373  | 2.052226 |
| 9  | 6 | 0 | 2.696888  | -0.050192 | 4.217238 |
| 10 | 1 | 0 | 0.593528  | 0.274512  | 4.142312 |
| 11 | 1 | 0 | 1.090448  | -1.338063 | 3.659744 |
| 12 | 6 | 0 | 3.442221  | -0.976556 | 4.741268 |

|    |    |   |           |           |           |
|----|----|---|-----------|-----------|-----------|
| 13 | 1  | 0 | 3.067396  | 0.975032  | 4.217190  |
| 14 | 6  | 0 | 4.179744  | -1.905757 | 5.266739  |
| 15 | 1  | 0 | 4.098711  | -2.169837 | 6.317221  |
| 16 | 1  | 0 | 4.908163  | -2.455251 | 4.677526  |
| 17 | 16 | 0 | -1.383437 | 0.065976  | -0.767372 |
| 18 | 17 | 0 | -2.652874 | -1.937485 | 3.557906  |
| 19 | 6  | 0 | -2.756276 | -0.223799 | 0.304977  |
| 20 | 8  | 0 | -1.657563 | 1.248472  | -1.518924 |
| 21 | 8  | 0 | -1.062724 | -1.164527 | -1.425383 |
| 22 | 6  | 0 | -3.478345 | 0.862157  | 0.799139  |
| 23 | 6  | 0 | -4.543794 | 0.656364  | 1.659234  |
| 24 | 6  | 0 | -4.905353 | -0.620476 | 2.051429  |
| 25 | 6  | 0 | -4.147356 | -1.711354 | 1.565432  |
| 26 | 6  | 0 | -3.086053 | -1.507454 | 0.669513  |
| 27 | 1  | 0 | -3.207291 | 1.866607  | 0.493410  |
| 28 | 1  | 0 | -5.107667 | 1.505875  | 2.027280  |
| 29 | 6  | 0 | -6.037740 | -0.874987 | 2.974504  |
| 30 | 1  | 0 | -4.492504 | -2.719634 | 1.761675  |
| 31 | 1  | 0 | -2.532587 | -2.353146 | 0.279523  |
| 32 | 1  | 0 | -6.745001 | -1.585849 | 2.539146  |
| 33 | 1  | 0 | -5.670501 | -1.323534 | 3.902655  |
| 34 | 1  | 0 | -6.572879 | 0.041093  | 3.222254  |

Cpl [Cl<sup>-</sup> Toluene] (Table S-2c)

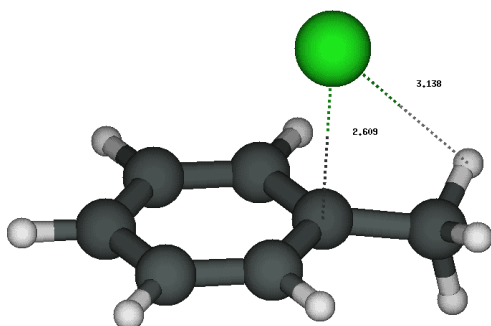

|    |    |   |           |           |           |
|----|----|---|-----------|-----------|-----------|
| 1  | 6  | 0 | 0.002373  | 0.001643  | 0.009380  |
| 2  | 6  | 0 | -0.000012 | 0.004717  | 1.495526  |
| 3  | 1  | 0 | 1.017691  | -0.006334 | -0.388201 |
| 4  | 1  | 0 | -0.538729 | -0.856335 | -0.390364 |
| 5  | 1  | 0 | -0.491451 | 0.907802  | -0.358567 |
| 6  | 6  | 0 | -1.107991 | -0.495534 | 2.215052  |
| 7  | 6  | 0 | -1.215080 | -0.299253 | 3.571554  |
| 8  | 6  | 0 | -0.222877 | 0.396301  | 4.251334  |
| 9  | 6  | 0 | 0.884341  | 0.891742  | 3.568404  |
| 10 | 6  | 0 | 0.997169  | 0.700034  | 2.213572  |
| 11 | 1  | 0 | -1.874416 | -1.037345 | 1.671328  |
| 12 | 1  | 0 | -2.068660 | -0.691947 | 4.110402  |
| 13 | 1  | 0 | -0.307162 | 0.547804  | 5.321225  |
| 14 | 1  | 0 | 1.658818  | 1.424052  | 4.107097  |
| 15 | 1  | 0 | 1.854864  | 1.080661  | 1.669473  |
| 16 | 17 | 0 | 1.224114  | -2.284221 | 1.759501  |

TS<sub>A</sub> (Table S-3) Imaginary frequency: 416 cm<sup>-1</sup>.

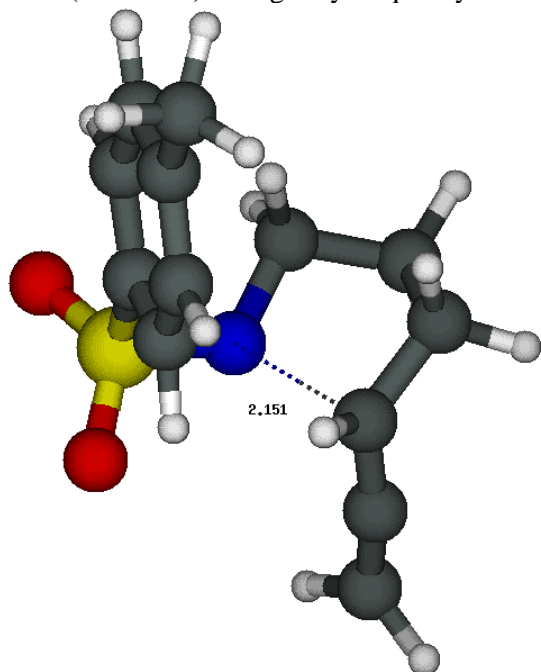


---

|    |    |   |           |           |           |
|----|----|---|-----------|-----------|-----------|
| 1  | 7  | 0 | -0.003136 | -0.028234 | 0.013634  |
| 2  | 6  | 0 | 0.055020  | -0.012460 | 1.455135  |
| 3  | 6  | 0 | 1.521023  | -0.060673 | 1.831904  |
| 4  | 1  | 0 | -0.416804 | 0.907504  | 1.819325  |
| 5  | 1  | 0 | -0.464238 | -0.864310 | 1.918522  |
| 6  | 6  | 0 | 2.111022  | -1.254324 | 1.100916  |
| 7  | 1  | 0 | 2.016318  | 0.858617  | 1.503632  |
| 8  | 1  | 0 | 1.648982  | -0.143806 | 2.912705  |
| 9  | 6  | 0 | 1.800644  | -1.137372 | -0.365717 |
| 10 | 1  | 0 | 3.190248  | -1.320241 | 1.257608  |
| 11 | 1  | 0 | 1.667651  | -2.178937 | 1.483409  |
| 12 | 6  | 0 | 2.398528  | -0.240355 | -1.161509 |
| 13 | 1  | 0 | 1.348772  | -1.994941 | -0.858012 |
| 14 | 6  | 0 | 2.769147  | 0.750986  | -1.897647 |
| 15 | 1  | 0 | 3.731592  | 0.787952  | -2.400750 |
| 16 | 1  | 0 | 2.095050  | 1.595292  | -2.046178 |
| 17 | 16 | 0 | -1.293717 | -0.650608 | -0.744779 |
| 18 | 6  | 0 | -1.519809 | -2.314574 | -0.179365 |
| 19 | 8  | 0 | -2.435875 | 0.101906  | -0.302000 |
| 20 | 8  | 0 | -0.972970 | -0.711115 | -2.138593 |
| 21 | 6  | 0 | -2.259665 | -2.567135 | 0.966928  |
| 22 | 6  | 0 | -2.392795 | -3.865763 | 1.424126  |
| 23 | 6  | 0 | -1.804469 | -4.929611 | 0.750136  |
| 24 | 6  | 0 | -1.079455 | -4.658245 | -0.406653 |
| 25 | 6  | 0 | -0.936786 | -3.366080 | -0.873517 |
| 26 | 1  | 0 | -2.746222 | -1.748894 | 1.484447  |
| 27 | 1  | 0 | -2.973129 | -4.060890 | 2.320281  |
| 28 | 6  | 0 | -1.980131 | -6.332930 | 1.226545  |
| 29 | 1  | 0 | -0.628462 | -5.479339 | -0.954986 |
| 30 | 1  | 0 | -0.395698 | -3.168595 | -1.791631 |
| 31 | 1  | 0 | -1.093187 | -6.937304 | 1.027231  |
| 32 | 1  | 0 | -2.189905 | -6.371053 | 2.296638  |
| 33 | 1  | 0 | -2.818125 | -6.814473 | 0.713730  |

---

**R<sub>1</sub>** (Table S-3)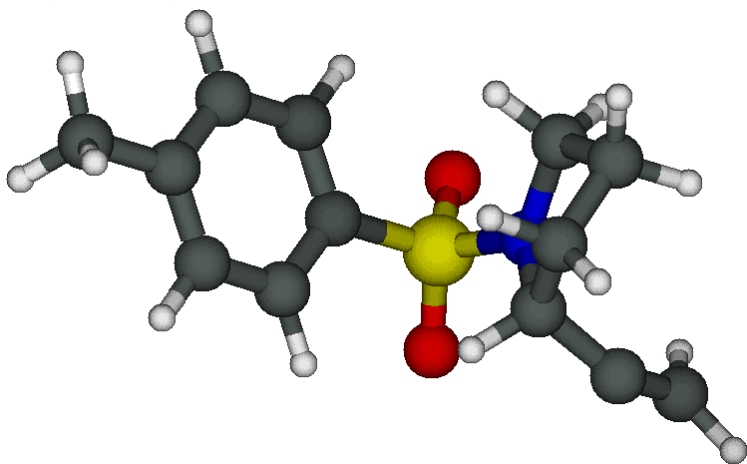

---

|    |    |   |           |           |           |
|----|----|---|-----------|-----------|-----------|
| 1  | 7  | 0 | -0.019686 | -0.024766 | -0.013281 |
| 2  | 6  | 0 | -0.009177 | -0.021852 | 1.456673  |
| 3  | 6  | 0 | 1.469750  | -0.022994 | 1.790758  |
| 4  | 1  | 0 | -0.549319 | 0.842752  | 1.842554  |
| 5  | 1  | 0 | -0.488410 | -0.929499 | 1.847949  |
| 6  | 6  | 0 | 2.061380  | -0.868561 | 0.678292  |
| 7  | 1  | 0 | 1.868210  | 0.994370  | 1.743183  |
| 8  | 1  | 0 | 1.665761  | -0.417574 | 2.787497  |
| 9  | 6  | 0 | 1.318451  | -0.366425 | -0.559573 |
| 10 | 1  | 0 | 3.142394  | -0.774596 | 0.574702  |
| 11 | 1  | 0 | 1.817057  | -1.924309 | 0.836040  |
| 12 | 6  | 0 | 1.945109  | 0.815840  | -1.163918 |
| 13 | 1  | 0 | 1.227616  | -1.154737 | -1.313412 |
| 14 | 6  | 0 | 1.681126  | 2.067519  | -1.395292 |
| 15 | 1  | 0 | 2.390674  | 2.735082  | -1.877052 |
| 16 | 1  | 0 | 0.714683  | 2.500944  | -1.125346 |
| 17 | 16 | 0 | -1.370957 | -0.470408 | -0.815360 |
| 18 | 6  | 0 | -1.486728 | -2.220429 | -0.602356 |
| 19 | 8  | 0 | -2.468993 | 0.127899  | -0.121997 |
| 20 | 8  | 0 | -1.136517 | -0.213837 | -2.201592 |
| 21 | 6  | 0 | -2.146663 | -2.740988 | 0.500654  |
| 22 | 6  | 0 | -2.181997 | -4.111176 | 0.691167  |
| 23 | 6  | 0 | -1.569545 | -4.977271 | -0.205606 |
| 24 | 6  | 0 | -0.921750 | -4.434598 | -1.312821 |
| 25 | 6  | 0 | -0.877360 | -3.070598 | -1.517603 |
| 26 | 1  | 0 | -2.650988 | -2.075998 | 1.191407  |
| 27 | 1  | 0 | -2.705764 | -4.518103 | 1.549906  |
| 28 | 6  | 0 | -1.610429 | -6.456077 | -0.010743 |
| 29 | 1  | 0 | -0.455285 | -5.100661 | -2.032150 |
| 30 | 1  | 0 | -0.396053 | -2.660147 | -2.397291 |
| 31 | 1  | 0 | -2.143820 | -6.728863 | 0.900473  |
| 32 | 1  | 0 | -2.105888 | -6.948782 | -0.851411 |
| 33 | 1  | 0 | -0.601697 | -6.872798 | 0.049948  |

---

**TS<sub>B</sub>** (Table S-3) Imaginary frequency: 471 cm<sup>-1</sup>.

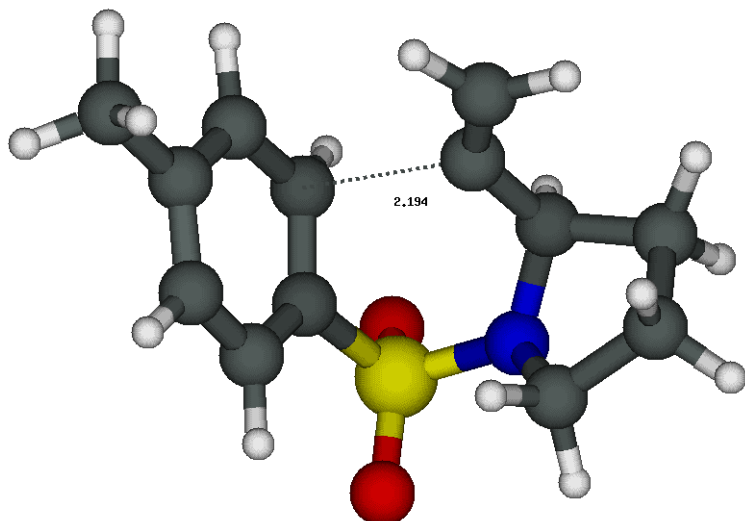

|    |    |   |           |           |           |
|----|----|---|-----------|-----------|-----------|
| 1  | 7  | 0 | -0.009460 | 0.021414  | 0.000071  |
| 2  | 6  | 0 | 0.000800  | 0.067861  | 1.468041  |
| 3  | 6  | 0 | 1.489135  | -0.016784 | 1.827881  |
| 4  | 1  | 0 | -0.440637 | 1.002450  | 1.839109  |
| 5  | 1  | 0 | -0.590115 | -0.759310 | 1.858793  |
| 6  | 6  | 0 | 2.232459  | -0.071544 | 0.493134  |
| 7  | 1  | 0 | 1.785063  | 0.862282  | 2.402027  |
| 8  | 1  | 0 | 1.705696  | -0.890804 | 2.441807  |
| 9  | 6  | 0 | 1.264047  | 0.574483  | -0.494416 |
| 10 | 1  | 0 | 3.201505  | 0.427312  | 0.515950  |
| 11 | 1  | 0 | 2.394115  | -1.105040 | 0.180792  |
| 12 | 6  | 0 | 1.292819  | 2.059733  | -0.454302 |
| 13 | 1  | 0 | 1.421631  | 0.229385  | -1.520030 |
| 14 | 6  | 0 | 2.061209  | 2.969188  | 0.078947  |
| 15 | 1  | 0 | 1.859602  | 4.032289  | -0.033586 |
| 16 | 1  | 0 | 2.950717  | 2.713185  | 0.658033  |
| 17 | 16 | 0 | -1.392797 | 0.370952  | -0.812883 |
| 18 | 6  | 0 | -1.435868 | 2.119529  | -0.744453 |
| 19 | 8  | 0 | -1.181804 | -0.019416 | -2.172101 |
| 20 | 8  | 0 | -2.473327 | -0.170272 | -0.050730 |
| 21 | 6  | 0 | -0.474072 | 2.807065  | -1.519842 |
| 22 | 6  | 0 | -0.438638 | 4.209509  | -1.423883 |
| 23 | 6  | 0 | -1.198904 | 4.884490  | -0.489045 |
| 24 | 6  | 0 | -2.065899 | 4.156683  | 0.334039  |
| 25 | 6  | 0 | -2.187069 | 2.782265  | 0.203865  |
| 26 | 1  | 0 | -0.069528 | 2.325037  | -2.403342 |
| 27 | 1  | 0 | 0.218709  | 4.767256  | -2.083232 |
| 28 | 6  | 0 | -1.129336 | 6.369804  | -0.358863 |
| 29 | 1  | 0 | -2.669704 | 4.684358  | 1.065350  |
| 30 | 1  | 0 | -2.876488 | 2.223318  | 0.825954  |
| 31 | 1  | 0 | -0.431066 | 6.805841  | -1.074226 |
| 32 | 1  | 0 | -2.109664 | 6.825210  | -0.521374 |
| 33 | 1  | 0 | -0.809632 | 6.659393  | 0.645855  |

4a' (Table S-3)

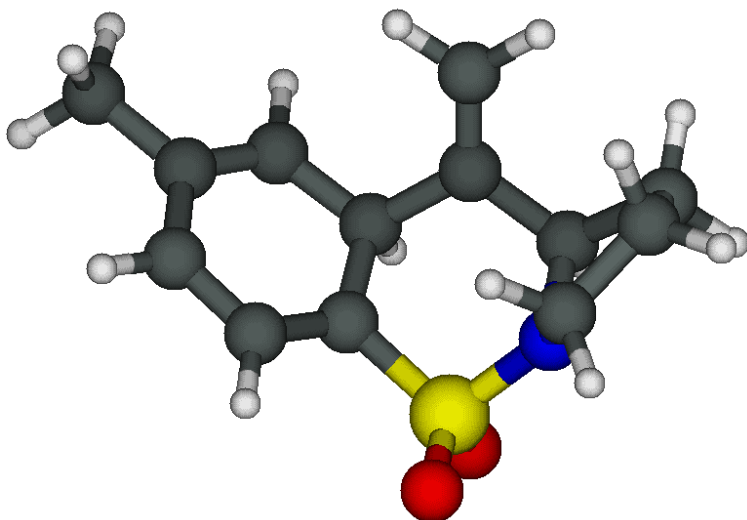

|    |    |   |           |           |           |
|----|----|---|-----------|-----------|-----------|
| 1  | 7  | 0 | -0.009629 | 0.022359  | 0.001438  |
| 2  | 6  | 0 | 0.000295  | 0.064734  | 1.470195  |
| 3  | 6  | 0 | 1.489158  | -0.024778 | 1.822831  |
| 4  | 1  | 0 | -0.439587 | 0.998958  | 1.843935  |
| 5  | 1  | 0 | -0.592208 | -0.761748 | 1.859330  |
| 6  | 6  | 0 | 2.231918  | 0.039566  | 0.484413  |
| 7  | 1  | 0 | 1.770943  | 0.802388  | 2.475622  |
| 8  | 1  | 0 | 1.717991  | -0.946932 | 2.356876  |
| 9  | 6  | 0 | 1.237996  | 0.661598  | -0.479112 |
| 10 | 1  | 0 | 3.176009  | 0.581049  | 0.536024  |
| 11 | 1  | 0 | 2.454241  | -0.967793 | 0.128498  |
| 12 | 6  | 0 | 1.119892  | 2.171603  | -0.442816 |
| 13 | 1  | 0 | 1.408023  | 0.341863  | -1.512077 |
| 14 | 6  | 0 | 1.899966  | 2.960118  | 0.279386  |
| 15 | 1  | 0 | 1.766199  | 4.035450  | 0.294845  |
| 16 | 1  | 0 | 2.710454  | 2.571705  | 0.884187  |
| 17 | 16 | 0 | -1.387662 | 0.398189  | -0.803048 |
| 18 | 6  | 0 | -1.326187 | 2.140343  | -0.788720 |
| 19 | 8  | 0 | -1.208093 | -0.030682 | -2.156958 |
| 20 | 8  | 0 | -2.494450 | -0.075764 | -0.033537 |
| 21 | 6  | 0 | -0.033659 | 2.716251  | -1.292493 |
| 22 | 6  | 0 | -0.086535 | 4.202054  | -1.363405 |
| 23 | 6  | 0 | -1.121591 | 4.944119  | -0.898155 |
| 24 | 6  | 0 | -2.247567 | 4.299487  | -0.322360 |
| 25 | 6  | 0 | -2.333739 | 2.903521  | -0.291248 |
| 26 | 1  | 0 | 0.141957  | 2.322424  | -2.309554 |
| 27 | 1  | 0 | 0.769141  | 4.698667  | -1.812218 |
| 28 | 6  | 0 | -1.119818 | 6.434930  | -0.982863 |
| 29 | 1  | 0 | -3.062378 | 4.900363  | 0.067184  |
| 30 | 1  | 0 | -3.215763 | 2.417283  | 0.111440  |
| 31 | 1  | 0 | -0.206152 | 6.812438  | -1.443337 |
| 32 | 1  | 0 | -1.969786 | 6.794554  | -1.569142 |
| 33 | 1  | 0 | -1.210235 | 6.882042  | 0.010953  |



Cpl [ 1a' NCS ] (Table S-3)

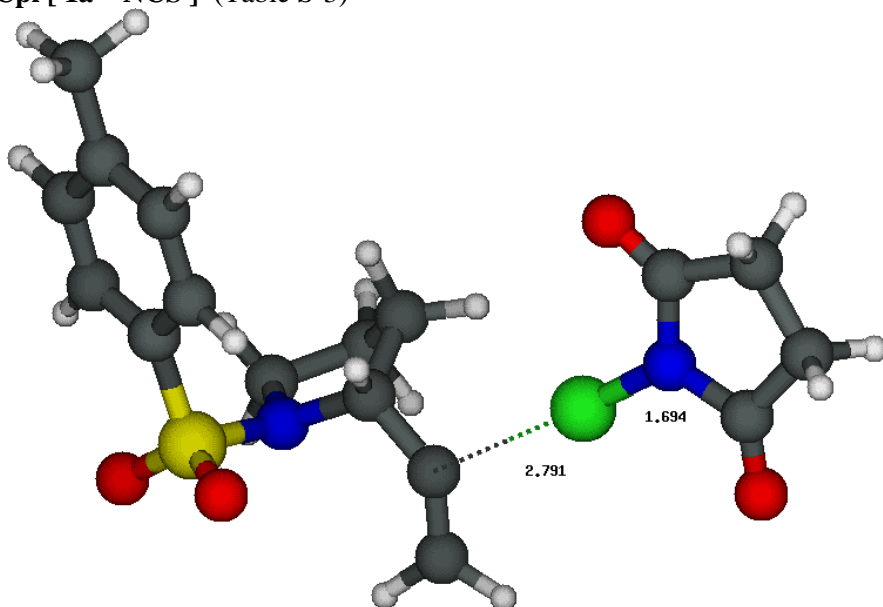


---

|    |    |   |           |           |           |
|----|----|---|-----------|-----------|-----------|
| 1  | 7  | 0 | 0.003601  | -0.056992 | -0.034622 |
| 2  | 6  | 0 | 0.026325  | -0.041782 | 1.435637  |
| 3  | 6  | 0 | 1.507696  | -0.069883 | 1.755718  |
| 4  | 1  | 0 | -0.493432 | 0.836960  | 1.817172  |
| 5  | 1  | 0 | -0.467755 | -0.936343 | 1.838642  |
| 6  | 6  | 0 | 2.069249  | -0.947381 | 0.652421  |
| 7  | 1  | 0 | 1.927622  | 0.937737  | 1.687124  |
| 8  | 1  | 0 | 1.705229  | -0.452020 | 2.756951  |
| 9  | 6  | 0 | 1.321965  | -0.452481 | -0.585911 |
| 10 | 1  | 0 | 3.151023  | -0.880960 | 0.534121  |
| 11 | 1  | 0 | 1.805008  | -1.994923 | 0.829357  |
| 12 | 6  | 0 | 1.971842  | 0.698851  | -1.224742 |
| 13 | 1  | 0 | 1.207190  | -1.253949 | -1.323440 |
| 14 | 6  | 0 | 1.784272  | 1.958108  | -1.482224 |
| 15 | 1  | 0 | 2.524674  | 2.561231  | -2.001375 |
| 16 | 1  | 0 | 0.856032  | 2.458675  | -1.197519 |
| 17 | 16 | 0 | -1.367666 | -0.475470 | -0.821541 |
| 18 | 6  | 0 | -1.519370 | -2.220153 | -0.593751 |
| 19 | 8  | 0 | -2.442526 | 0.154516  | -0.120260 |
| 20 | 8  | 0 | -1.140205 | -0.231146 | -2.210893 |
| 21 | 6  | 0 | -2.190172 | -2.716144 | 0.513936  |
| 22 | 6  | 0 | -2.250814 | -4.083235 | 0.719327  |
| 23 | 6  | 0 | -1.651466 | -4.969998 | -0.166029 |
| 24 | 6  | 0 | -0.992108 | -4.451569 | -1.277992 |
| 25 | 6  | 0 | -0.923541 | -3.091131 | -1.498479 |
| 26 | 1  | 0 | -2.682490 | -2.034119 | 1.196679  |
| 27 | 1  | 0 | -2.783261 | -4.470995 | 1.581581  |
| 28 | 6  | 0 | -1.715612 | -6.445323 | 0.047679  |
| 29 | 1  | 0 | -0.533782 | -5.133433 | -1.987564 |
| 30 | 1  | 0 | -0.431816 | -2.700520 | -2.381377 |
| 31 | 1  | 0 | -2.202404 | -6.943226 | -0.794917 |
| 32 | 1  | 0 | -0.713381 | -6.873596 | 0.131855  |
| 33 | 1  | 0 | -2.267926 | -6.698488 | 0.953285  |
| 34 | 17 | 0 | 4.283461  | -0.310138 | -2.418665 |
| 35 | 7  | 0 | 5.647421  | -1.009286 | -3.140023 |
| 36 | 6  | 0 | 6.563636  | -0.266254 | -3.889183 |
| 37 | 8  | 0 | 6.491422  | 0.907304  | -4.097000 |
| 38 | 6  | 0 | 7.615265  | -1.241545 | -4.348420 |

|    |   |   |          |           |           |
|----|---|---|----------|-----------|-----------|
| 39 | 6 | 0 | 5.932436 | -2.370674 | -3.025465 |
| 40 | 8 | 0 | 5.272542 | -3.164044 | -2.422865 |
| 41 | 6 | 0 | 7.203164 | -2.599262 | -3.800246 |
| 42 | 1 | 0 | 7.662671 | -1.207278 | -5.437768 |
| 43 | 1 | 0 | 8.582659 | -0.898989 | -3.978179 |
| 44 | 1 | 0 | 7.000551 | -3.337979 | -4.577243 |
| 45 | 1 | 0 | 7.940378 | -3.040754 | -3.128135 |

---

**TS<sub>c</sub>** (Table S-3) Imaginary frequency: 318 cm<sup>-1</sup>.

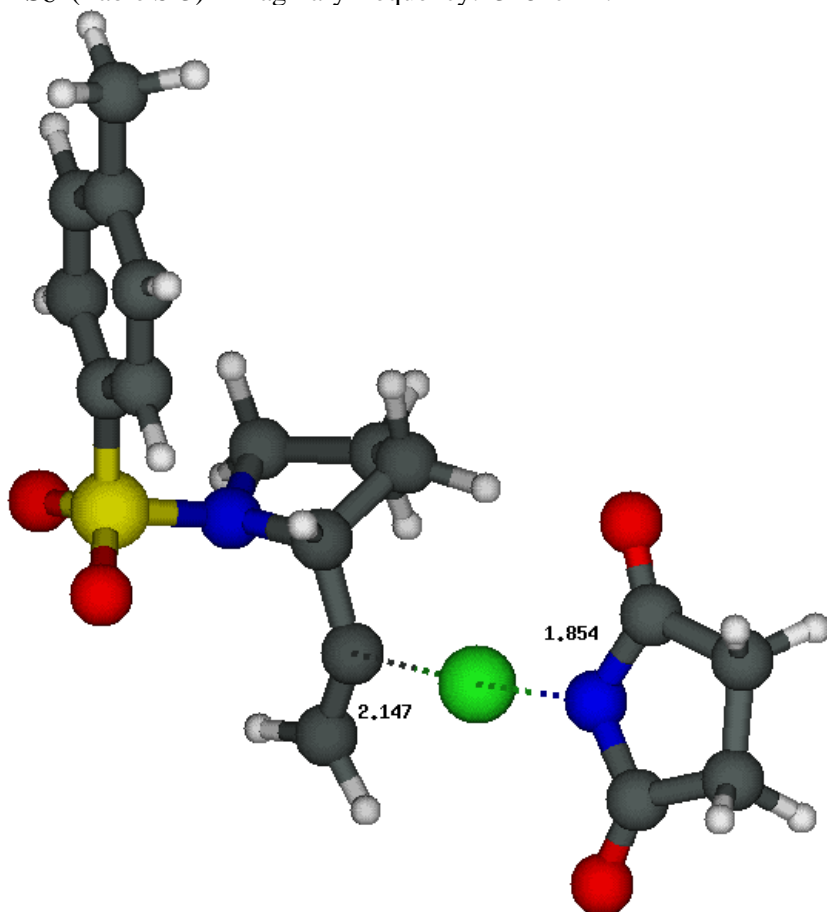


---

|    |    |   |           |           |           |
|----|----|---|-----------|-----------|-----------|
| 1  | 7  | 0 | 0.052195  | -0.097799 | -0.021904 |
| 2  | 6  | 0 | 0.159530  | -0.142698 | 1.445013  |
| 3  | 6  | 0 | 1.656030  | -0.210523 | 1.676478  |
| 4  | 1  | 0 | -0.320914 | 0.728154  | 1.890720  |
| 5  | 1  | 0 | -0.329925 | -1.044744 | 1.836230  |
| 6  | 6  | 0 | 2.139671  | -1.036557 | 0.498873  |
| 7  | 1  | 0 | 2.090220  | 0.792628  | 1.639841  |
| 8  | 1  | 0 | 1.903492  | -0.649880 | 2.642319  |
| 9  | 6  | 0 | 1.320034  | -0.479207 | -0.663760 |
| 10 | 1  | 0 | 3.212482  | -0.981852 | 0.318134  |
| 11 | 1  | 0 | 1.869883  | -2.088296 | 0.636785  |
| 12 | 6  | 0 | 1.920679  | 0.726477  | -1.281723 |
| 13 | 1  | 0 | 1.163032  | -1.234220 | -1.440200 |
| 14 | 6  | 0 | 1.688340  | 2.002535  | -1.369717 |
| 15 | 1  | 0 | 2.352215  | 2.682690  | -1.891853 |
| 16 | 1  | 0 | 0.783553  | 2.419528  | -0.928652 |
| 17 | 16 | 0 | -1.375682 | -0.446285 | -0.749533 |
| 18 | 6  | 0 | -1.568284 | -2.190664 | -0.570419 |

|    |    |   |           |           |           |
|----|----|---|-----------|-----------|-----------|
| 19 | 8  | 0 | -2.386588 | 0.192816  | 0.032496  |
| 20 | 8  | 0 | -1.210152 | -0.156340 | -2.138369 |
| 21 | 6  | 0 | -2.210316 | -2.702030 | 0.547173  |
| 22 | 6  | 0 | -2.305687 | -4.072627 | 0.710448  |
| 23 | 6  | 0 | -1.769147 | -4.946579 | -0.226563 |
| 24 | 6  | 0 | -1.136982 | -4.411538 | -1.346602 |
| 25 | 6  | 0 | -1.034676 | -3.047425 | -1.526239 |
| 26 | 1  | 0 | -2.652576 | -2.028163 | 1.270969  |
| 27 | 1  | 0 | -2.815415 | -4.473164 | 1.580472  |
| 28 | 6  | 0 | -1.873256 | -6.425447 | -0.059595 |
| 29 | 1  | 0 | -0.727681 | -5.083106 | -2.094845 |
| 30 | 1  | 0 | -0.565457 | -2.642801 | -2.415100 |
| 31 | 1  | 0 | -2.429096 | -6.874807 | -0.886680 |
| 32 | 1  | 0 | -0.884178 | -6.890651 | -0.053994 |
| 33 | 1  | 0 | -2.378110 | -6.692438 | 0.869357  |
| 34 | 17 | 0 | 3.670537  | 0.083791  | -2.346061 |
| 35 | 7  | 0 | 5.279786  | -0.502047 | -3.057224 |
| 36 | 6  | 0 | 6.027226  | 0.266919  | -3.933455 |
| 37 | 8  | 0 | 5.741805  | 1.356206  | -4.340157 |
| 38 | 6  | 0 | 7.259146  | -0.547998 | -4.262221 |
| 39 | 6  | 0 | 5.833939  | -1.714689 | -2.693681 |
| 40 | 8  | 0 | 5.364846  | -2.505302 | -1.923945 |
| 41 | 6  | 0 | 7.134352  | -1.832436 | -3.457235 |
| 42 | 1  | 0 | 7.283540  | -0.708908 | -5.341114 |
| 43 | 1  | 0 | 8.138983  | 0.045016  | -4.008165 |
| 44 | 1  | 0 | 7.090066  | -2.732268 | -4.072712 |
| 45 | 1  | 0 | 7.941384  | -1.978387 | -2.737605 |

---

Cpl [ 2a S' ] (Table S-3)

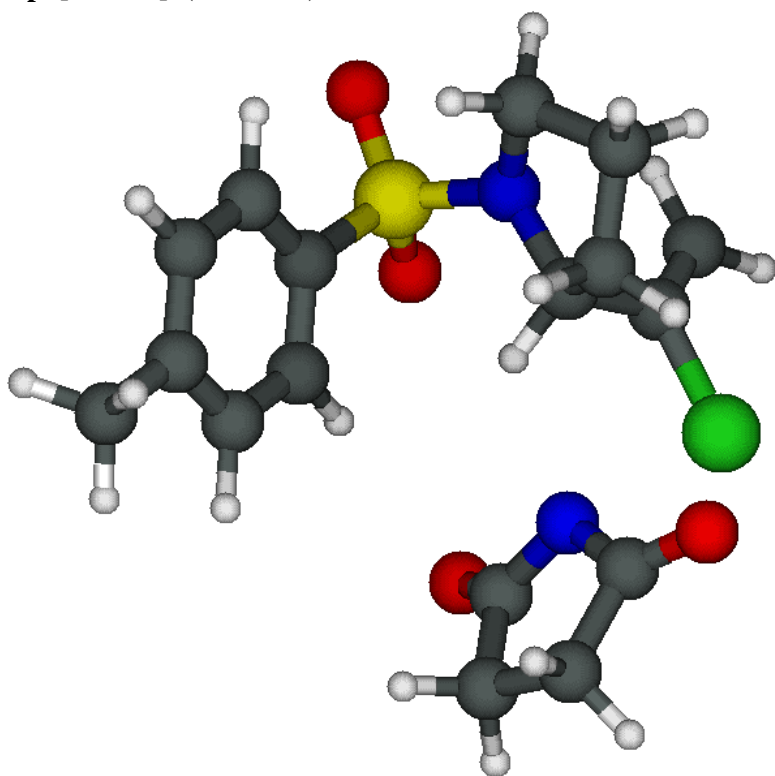


---

|   |   |   |           |           |           |
|---|---|---|-----------|-----------|-----------|
| 1 | 7 | 0 | -0.032416 | -0.012627 | -0.023143 |
| 2 | 6 | 0 | -0.059679 | -0.000686 | 1.448915  |

|    |    |   |           |           |           |
|----|----|---|-----------|-----------|-----------|
| 3  | 6  | 0 | 1.410478  | -0.002193 | 1.811386  |
| 4  | 1  | 0 | -0.609417 | 0.867198  | 1.812742  |
| 5  | 1  | 0 | -0.549606 | -0.904172 | 1.835690  |
| 6  | 6  | 0 | 2.013522  | -0.877068 | 0.728739  |
| 7  | 1  | 0 | 1.816656  | 1.011578  | 1.750092  |
| 8  | 1  | 0 | 1.587043  | -0.376495 | 2.819481  |
| 9  | 6  | 0 | 1.283179  | -0.410040 | -0.531195 |
| 10 | 1  | 0 | 3.096934  | -0.803775 | 0.638719  |
| 11 | 1  | 0 | 1.760468  | -1.928480 | 0.905441  |
| 12 | 6  | 0 | 1.973194  | 0.725325  | -1.231313 |
| 13 | 1  | 0 | 1.198365  | -1.231401 | -1.253588 |
| 14 | 6  | 0 | 1.582333  | 1.979693  | -1.320003 |
| 15 | 1  | 0 | 2.155891  | 2.725638  | -1.853454 |
| 16 | 1  | 0 | 0.647451  | 2.275959  | -0.860046 |
| 17 | 16 | 0 | -1.379533 | -0.458012 | -0.848344 |
| 18 | 6  | 0 | -1.434314 | -2.217113 | -0.711722 |
| 19 | 8  | 0 | -2.485099 | 0.082905  | -0.120958 |
| 20 | 8  | 0 | -1.158684 | -0.130852 | -2.220358 |
| 21 | 6  | 0 | -2.054477 | -2.810134 | 0.381717  |
| 22 | 6  | 0 | -2.031993 | -4.184137 | 0.511586  |
| 23 | 6  | 0 | -1.399322 | -4.987972 | -0.433822 |
| 24 | 6  | 0 | -0.795457 | -4.374693 | -1.524485 |
| 25 | 6  | 0 | -0.810220 | -2.998824 | -1.672542 |
| 26 | 1  | 0 | -2.571843 | -2.195627 | 1.108729  |
| 27 | 1  | 0 | -2.525009 | -4.651393 | 1.358515  |
| 28 | 6  | 0 | -1.392661 | -6.471573 | -0.273151 |
| 29 | 1  | 0 | -0.318719 | -4.986246 | -2.284453 |
| 30 | 1  | 0 | -0.353937 | -2.536379 | -2.539844 |
| 31 | 1  | 0 | -2.410602 | -6.864615 | -0.211112 |
| 32 | 1  | 0 | -0.891539 | -6.965311 | -1.106559 |
| 33 | 1  | 0 | -0.883950 | -6.765062 | 0.649043  |
| 34 | 17 | 0 | 3.474309  | 0.221902  | -1.985036 |
| 35 | 7  | 0 | 3.199354  | -2.633547 | -1.717193 |
| 36 | 6  | 0 | 4.436114  | -3.089425 | -1.285747 |
| 37 | 8  | 0 | 5.161716  | -2.583228 | -0.482245 |
| 38 | 6  | 0 | 4.650157  | -4.406782 | -2.018198 |
| 39 | 6  | 0 | 2.761896  | -3.181553 | -2.910934 |
| 40 | 8  | 0 | 1.911347  | -2.756185 | -3.637306 |
| 41 | 6  | 0 | 3.548386  | -4.473443 | -3.069170 |
| 42 | 1  | 0 | 5.658338  | -4.390938 | -2.435544 |
| 43 | 1  | 0 | 4.613511  | -5.218478 | -1.290591 |
| 44 | 1  | 0 | 3.913490  | -4.521145 | -4.096131 |
| 45 | 1  | 0 | 2.862536  | -5.310531 | -2.929176 |

---

2a (Table S-3)

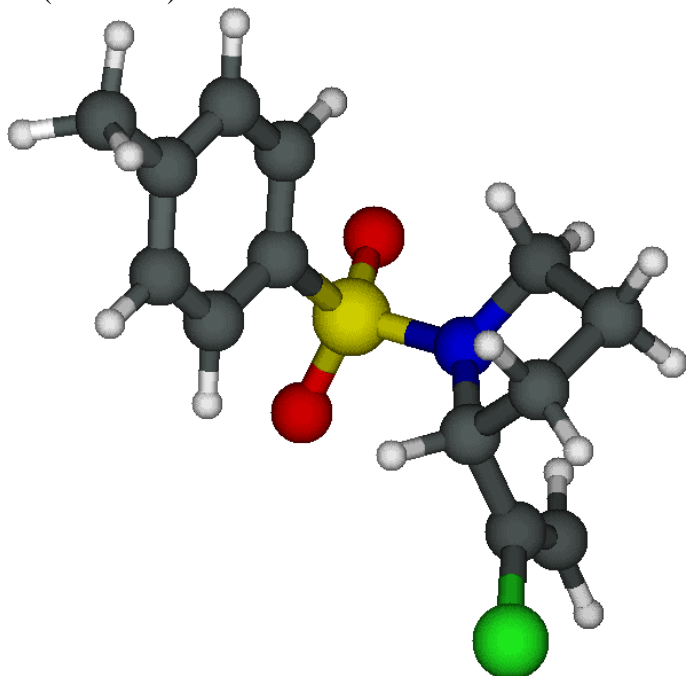


---

|    |    |   |           |           |           |
|----|----|---|-----------|-----------|-----------|
| 1  | 7  | 0 | -0.026898 | -0.016020 | -0.009872 |
| 2  | 6  | 0 | -0.016631 | 0.000829  | 1.461533  |
| 3  | 6  | 0 | 1.462386  | -0.017485 | 1.790957  |
| 4  | 1  | 0 | -0.544682 | 0.877273  | 1.837547  |
| 5  | 1  | 0 | -0.509856 | -0.894956 | 1.861875  |
| 6  | 6  | 0 | 2.038568  | -0.876245 | 0.680322  |
| 7  | 1  | 0 | 1.874406  | 0.994219  | 1.740056  |
| 8  | 1  | 0 | 1.657591  | -0.411282 | 2.788093  |
| 9  | 6  | 0 | 1.283342  | -0.384050 | -0.555624 |
| 10 | 1  | 0 | 3.119855  | -0.798930 | 0.570513  |
| 11 | 1  | 0 | 1.786272  | -1.928311 | 0.848765  |
| 12 | 6  | 0 | 1.948056  | 0.787559  | -1.222576 |
| 13 | 1  | 0 | 1.187636  | -1.182834 | -1.298856 |
| 14 | 6  | 0 | 1.541971  | 2.040559  | -1.238217 |
| 15 | 1  | 0 | 2.099545  | 2.816178  | -1.745919 |
| 16 | 1  | 0 | 0.613663  | 2.307572  | -0.748178 |
| 17 | 16 | 0 | -1.393185 | -0.448691 | -0.801441 |
| 18 | 6  | 0 | -1.529536 | -2.194639 | -0.576603 |
| 19 | 8  | 0 | -2.473402 | 0.170933  | -0.099769 |
| 20 | 8  | 0 | -1.166086 | -0.201511 | -2.190119 |
| 21 | 6  | 0 | -2.194909 | -2.699472 | 0.530437  |
| 22 | 6  | 0 | -2.250666 | -4.067946 | 0.727345  |
| 23 | 6  | 0 | -1.652995 | -4.947318 | -0.166550 |
| 24 | 6  | 0 | -0.998778 | -4.419904 | -1.277363 |
| 25 | 6  | 0 | -0.934389 | -3.057875 | -1.489137 |
| 26 | 1  | 0 | -2.688066 | -2.023684 | 1.218724  |
| 27 | 1  | 0 | -2.779211 | -4.462805 | 1.588735  |
| 28 | 6  | 0 | -1.715652 | -6.424260 | 0.035681  |
| 29 | 1  | 0 | -0.543376 | -5.096239 | -1.994102 |
| 30 | 1  | 0 | -0.448669 | -2.659623 | -2.371932 |
| 31 | 1  | 0 | -2.260107 | -6.684836 | 0.943893  |
| 32 | 1  | 0 | -2.210375 | -6.914694 | -0.806684 |
| 33 | 1  | 0 | -0.713051 | -6.853922 | 0.107090  |
| 34 | 17 | 0 | 3.428508  | 0.328594  | -2.038966 |

---

S<sup>•</sup> (Table S-3)

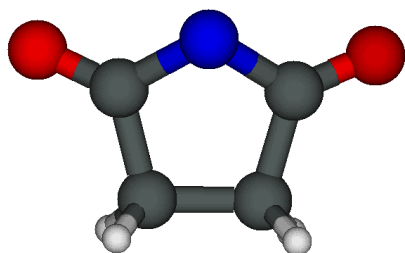


---

|    |   |   |           |           |           |
|----|---|---|-----------|-----------|-----------|
| 1  | 6 | 0 | 0.000445  | -0.001282 | 0.001740  |
| 2  | 6 | 0 | 0.000632  | 0.002698  | 1.527933  |
| 3  | 6 | 0 | 1.467939  | 0.005775  | -0.397602 |
| 4  | 1 | 0 | -0.473026 | -0.883664 | -0.430889 |
| 5  | 1 | 0 | -0.471812 | 0.874478  | -0.445912 |
| 6  | 6 | 0 | 1.468139  | 0.009382  | 1.927054  |
| 7  | 1 | 0 | -0.469815 | 0.881805  | 1.970927  |
| 8  | 1 | 0 | -0.474503 | -0.876343 | 1.965483  |
| 9  | 8 | 0 | 1.935528  | 0.219584  | -1.474727 |
| 10 | 7 | 0 | 2.154083  | -0.340745 | 0.765211  |
| 11 | 8 | 0 | 1.935964  | 0.225401  | 3.003653  |

---

Cpl [ 1a' 3a ] (Table S-3)

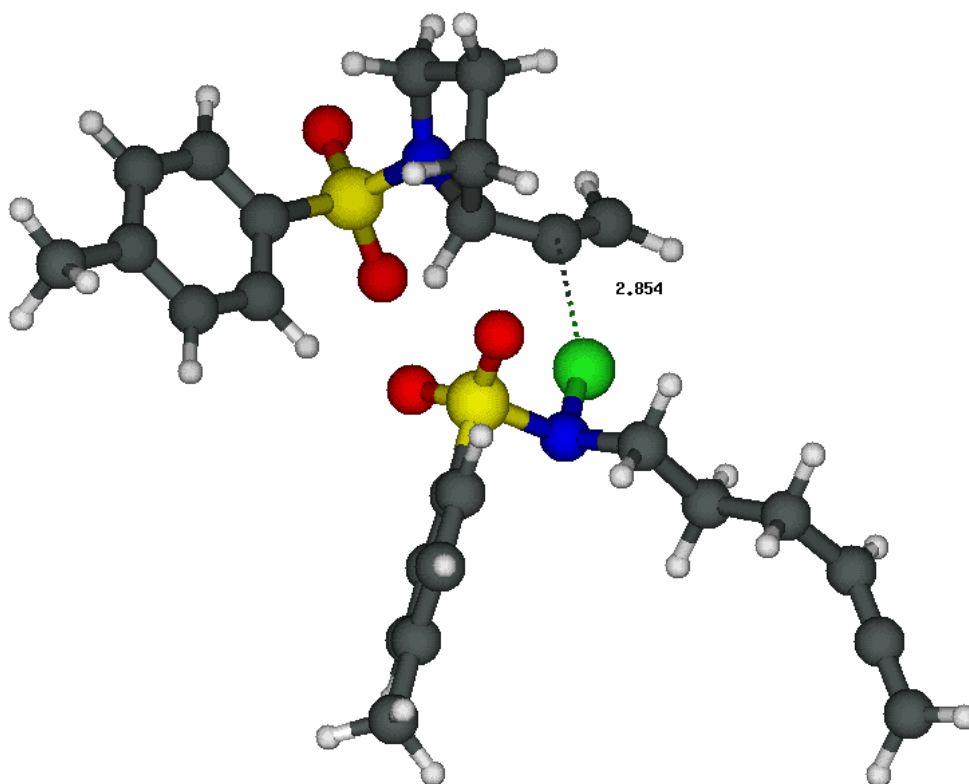


---

|   |   |   |           |           |           |
|---|---|---|-----------|-----------|-----------|
| 1 | 7 | 0 | -0.006642 | -0.037309 | -0.011329 |
| 2 | 6 | 0 | -0.060672 | -0.026246 | 1.458339  |
| 3 | 6 | 0 | 1.402112  | -0.007513 | 1.855724  |
| 4 | 1 | 0 | -0.628641 | 0.833496  | 1.814024  |
| 5 | 1 | 0 | -0.545016 | -0.938080 | 1.833531  |
| 6 | 6 | 0 | 2.049448  | -0.862613 | 0.782380  |
| 7 | 1 | 0 | 1.791559  | 1.013816  | 1.811231  |

---

|    |    |   |           |           |           |
|----|----|---|-----------|-----------|-----------|
| 8  | 1  | 0 | 1.558763  | -0.386355 | 2.865504  |
| 9  | 6  | 0 | 1.351085  | -0.390588 | -0.493081 |
| 10 | 1  | 0 | 3.133112  | -0.760633 | 0.717998  |
| 11 | 1  | 0 | 1.814838  | -1.920023 | 0.942069  |
| 12 | 6  | 0 | 1.999743  | 0.778486  | -1.100679 |
| 13 | 1  | 0 | 1.305630  | -1.197585 | -1.231815 |
| 14 | 6  | 0 | 1.785414  | 2.036495  | -1.346487 |
| 15 | 1  | 0 | 2.520768  | 2.670486  | -1.834256 |
| 16 | 1  | 0 | 0.834915  | 2.506498  | -1.082557 |
| 17 | 16 | 0 | -1.319659 | -0.510686 | -0.863180 |
| 18 | 6  | 0 | -1.424941 | -2.257058 | -0.621844 |
| 19 | 8  | 0 | -2.451553 | 0.088775  | -0.226610 |
| 20 | 8  | 0 | -1.030479 | -0.271030 | -2.242052 |
| 21 | 6  | 0 | -2.168129 | -2.763610 | 0.433513  |
| 22 | 6  | 0 | -2.190328 | -4.128634 | 0.659472  |
| 23 | 6  | 0 | -1.478317 | -5.002261 | -0.152364 |
| 24 | 6  | 0 | -0.745653 | -4.473726 | -1.212184 |
| 25 | 6  | 0 | -0.716028 | -3.115702 | -1.454235 |
| 26 | 1  | 0 | -2.742044 | -2.091066 | 1.059558  |
| 27 | 1  | 0 | -2.777751 | -4.525250 | 1.481141  |
| 28 | 6  | 0 | -1.500093 | -6.475617 | 0.083300  |
| 29 | 1  | 0 | -0.192153 | -5.144806 | -1.861373 |
| 30 | 1  | 0 | -0.159830 | -2.720940 | -2.296161 |
| 31 | 1  | 0 | -1.952304 | -7.000954 | -0.762258 |
| 32 | 1  | 0 | -0.487211 | -6.870349 | 0.196098  |
| 33 | 1  | 0 | -2.066289 | -6.733006 | 0.979227  |
| 34 | 17 | 0 | 4.140529  | -0.753376 | -2.203000 |
| 35 | 7  | 0 | 5.140020  | -2.120468 | -2.621867 |
| 36 | 6  | 0 | 6.565099  | -1.784344 | -2.519234 |
| 37 | 6  | 0 | 7.009426  | -0.925798 | -3.679168 |
| 38 | 1  | 0 | 6.780345  | -1.306397 | -1.554780 |
| 39 | 1  | 0 | 7.110915  | -2.734105 | -2.537748 |
| 40 | 6  | 0 | 8.496679  | -0.621016 | -3.602247 |
| 41 | 1  | 0 | 6.778968  | -1.441949 | -4.616951 |
| 42 | 1  | 0 | 6.442576  | 0.010992  | -3.688398 |
| 43 | 6  | 0 | 8.945194  | 0.263232  | -4.724034 |
| 44 | 1  | 0 | 8.711389  | -0.128480 | -2.645493 |
| 45 | 1  | 0 | 9.073718  | -1.550830 | -3.612554 |
| 46 | 6  | 0 | 9.847842  | -0.051182 | -5.604056 |
| 47 | 1  | 0 | 8.456917  | 1.234359  | -4.805389 |
| 48 | 6  | 0 | 10.753570 | -0.369378 | -6.477162 |
| 49 | 1  | 0 | 11.802800 | -0.137316 | -6.318622 |
| 50 | 1  | 0 | 10.498089 | -0.876335 | -7.403189 |
| 51 | 16 | 0 | 4.658170  | -3.455930 | -1.682909 |
| 52 | 6  | 0 | 5.421257  | -4.740242 | -2.608416 |
| 53 | 8  | 0 | 5.247320  | -3.398097 | -0.379315 |
| 54 | 8  | 0 | 3.239664  | -3.544197 | -1.817198 |
| 55 | 6  | 0 | 6.422535  | -5.500538 | -2.031336 |
| 56 | 6  | 0 | 6.986930  | -6.533860 | -2.758712 |
| 57 | 6  | 0 | 6.567843  | -6.810089 | -4.053643 |
| 58 | 6  | 0 | 5.559077  | -6.024868 | -4.612213 |
| 59 | 6  | 0 | 4.981687  | -4.995875 | -3.901426 |
| 60 | 1  | 0 | 6.750179  | -5.282982 | -1.021941 |
| 61 | 1  | 0 | 7.769812  | -7.137363 | -2.311963 |
| 62 | 6  | 0 | 7.169617  | -7.922297 | -4.843913 |
| 63 | 1  | 0 | 5.225529  | -6.233010 | -5.623829 |
| 64 | 1  | 0 | 4.195664  | -4.390094 | -4.337376 |
| 65 | 1  | 0 | 6.417129  | -8.675707 | -5.091495 |
| 66 | 1  | 0 | 7.573239  | -7.556366 | -5.791315 |

67                    1                    0                    7.974717                    -8.416520                    -4.299692

---

**TS<sub>D</sub>** (Table S-3) Imaginary frequency: 269 cm<sup>-1</sup>.

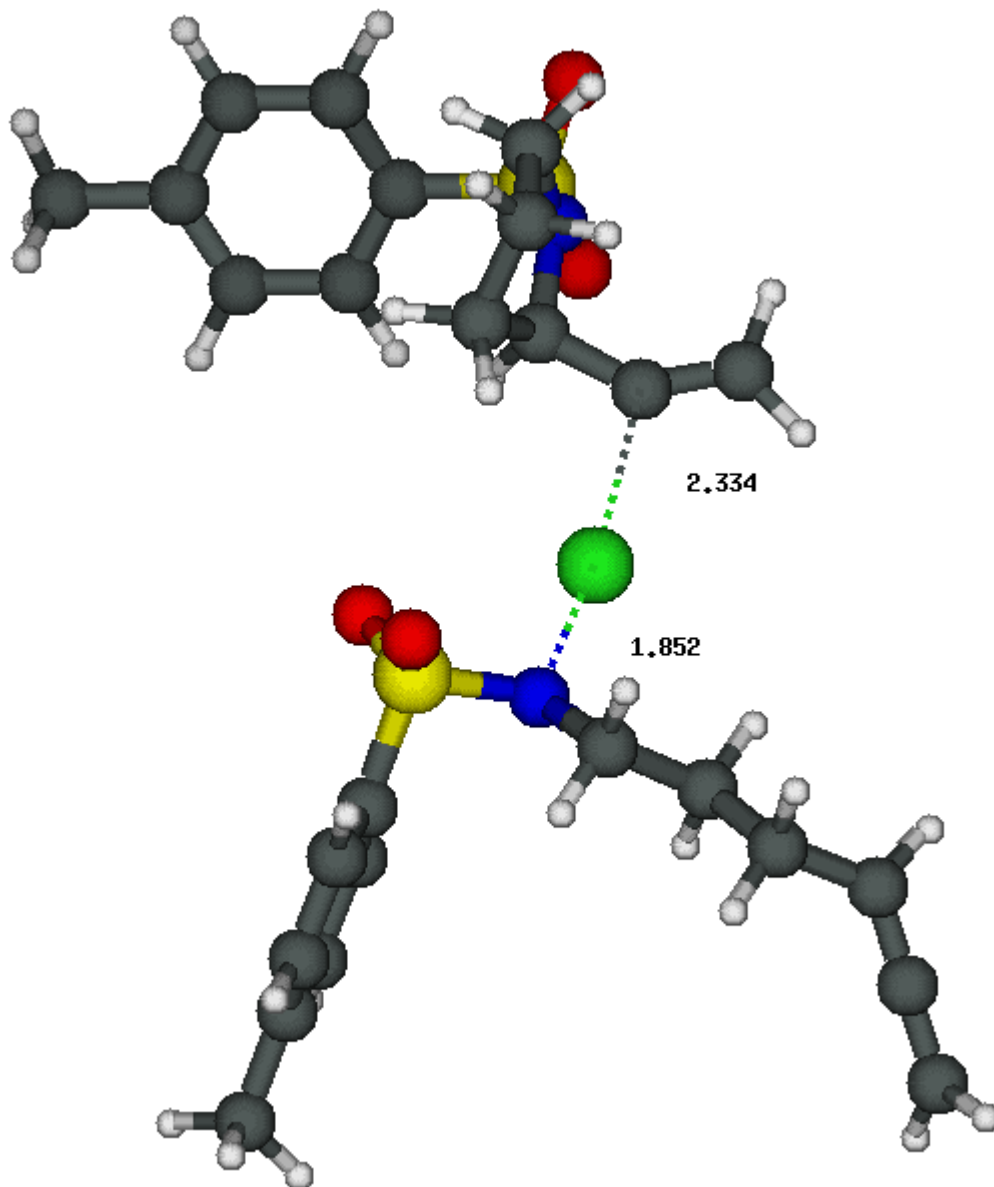

---

|    |   |   |           |           |           |
|----|---|---|-----------|-----------|-----------|
| 1  | 7 | 0 | 0.068217  | -0.074631 | 0.032705  |
| 2  | 6 | 0 | 0.112477  | -0.081572 | 1.503354  |
| 3  | 6 | 0 | 1.594161  | -0.197227 | 1.799908  |
| 4  | 1 | 0 | -0.353057 | 0.818839  | 1.903882  |
| 5  | 1 | 0 | -0.425425 | -0.953443 | 1.899630  |
| 6  | 6 | 0 | 2.091320  | -1.087458 | 0.676157  |
| 7  | 1 | 0 | 2.068840  | 0.786587  | 1.741609  |
| 8  | 1 | 0 | 1.784958  | -0.606082 | 2.791783  |
| 9  | 6 | 0 | 1.346171  | -0.542385 | -0.542305 |
| 10 | 1 | 0 | 3.172368  | -1.079734 | 0.539749  |
| 11 | 1 | 0 | 1.776012  | -2.122482 | 0.841628  |
| 12 | 6 | 0 | 2.037881  | 0.587903  | -1.188009 |
| 13 | 1 | 0 | 1.181984  | -1.327792 | -1.286947 |
| 14 | 6 | 0 | 1.919102  | 1.868390  | -1.369415 |
| 15 | 1 | 0 | 2.656870  | 2.454075  | -1.908973 |
| 16 | 1 | 0 | 1.042968  | 2.398844  | -0.992680 |



|    |    |   |           |           |           |
|----|----|---|-----------|-----------|-----------|
| 17 | 16 | 0 | -1.339540 | -0.403721 | -0.738160 |
| 18 | 6  | 0 | -1.591592 | -2.136793 | -0.518677 |
| 19 | 8  | 0 | -2.361884 | 0.286343  | -0.015384 |
| 20 | 8  | 0 | -1.116622 | -0.160125 | -2.128160 |
| 21 | 6  | 0 | -2.293005 | -2.597247 | 0.585329  |
| 22 | 6  | 0 | -2.432208 | -3.959348 | 0.785046  |
| 23 | 6  | 0 | -1.879769 | -4.875364 | -0.101106 |
| 24 | 6  | 0 | -1.188224 | -4.391519 | -1.209095 |
| 25 | 6  | 0 | -1.042910 | -3.036647 | -1.425304 |
| 26 | 1  | 0 | -2.746052 | -1.890210 | 1.269784  |
| 27 | 1  | 0 | -2.988413 | -4.319527 | 1.644252  |
| 28 | 6  | 0 | -2.024264 | -6.345358 | 0.109368  |
| 29 | 1  | 0 | -0.763957 | -5.095340 | -1.918271 |
| 30 | 1  | 0 | -0.525028 | -2.673248 | -2.304824 |
| 31 | 1  | 0 | -1.046811 | -6.824121 | 0.211383  |
| 32 | 1  | 0 | -2.604968 | -6.569967 | 1.004673  |
| 33 | 1  | 0 | -2.520053 | -6.817430 | -0.742739 |
| 34 | 17 | 0 | 3.869309  | -0.395943 | -2.248318 |
| 35 | 7  | 0 | 5.325723  | -1.363836 | -2.857897 |
| 36 | 6  | 0 | 6.533058  | -0.544897 | -2.747170 |
| 37 | 6  | 0 | 6.587409  | 0.498586  | -3.837923 |
| 38 | 1  | 0 | 6.609082  | -0.090165 | -1.750678 |
| 39 | 1  | 0 | 7.389387  | -1.222842 | -2.850590 |
| 40 | 6  | 0 | 7.867912  | 1.313683  | -3.759242 |
| 41 | 1  | 0 | 6.514543  | 0.005110  | -4.812485 |
| 42 | 1  | 0 | 5.721590  | 1.164182  | -3.758852 |
| 43 | 6  | 0 | 7.919011  | 2.382790  | -4.805929 |
| 44 | 1  | 0 | 7.935623  | 1.776851  | -2.766658 |
| 45 | 1  | 0 | 8.739135  | 0.658797  | -3.858383 |
| 46 | 6  | 0 | 8.841624  | 2.493591  | -5.713988 |
| 47 | 1  | 0 | 7.105410  | 3.108302  | -4.802389 |
| 48 | 6  | 0 | 9.768051  | 2.602045  | -6.616291 |
| 49 | 1  | 0 | 10.663381 | 3.192493  | -6.444080 |
| 50 | 1  | 0 | 9.683377  | 2.109792  | -7.580807 |
| 51 | 16 | 0 | 5.372278  | -2.794211 | -1.960809 |
| 52 | 6  | 0 | 6.496765  | -3.716288 | -2.953558 |
| 53 | 8  | 0 | 5.958729  | -2.579677 | -0.670326 |
| 54 | 8  | 0 | 4.072093  | -3.378613 | -2.054980 |
| 55 | 6  | 0 | 7.735800  | -4.066425 | -2.447802 |
| 56 | 6  | 0 | 8.595336  | -4.818998 | -3.229284 |
| 57 | 6  | 0 | 8.234555  | -5.218839 | -4.509301 |
| 58 | 6  | 0 | 6.981435  | -4.847600 | -4.996798 |
| 59 | 6  | 0 | 6.111334  | -4.102869 | -4.231060 |
| 60 | 1  | 0 | 8.016835  | -3.754276 | -1.449142 |
| 61 | 1  | 0 | 9.566369  | -5.101872 | -2.836945 |
| 62 | 6  | 0 | 9.152739  | -6.034472 | -5.355707 |
| 63 | 1  | 0 | 6.690658  | -5.154247 | -5.996624 |
| 64 | 1  | 0 | 5.137473  | -3.818359 | -4.612392 |
| 65 | 1  | 0 | 9.325502  | -5.555448 | -6.322659 |
| 66 | 1  | 0 | 10.118974 | -6.186859 | -4.873880 |
| 67 | 1  | 0 | 8.720999  | -7.017430 | -5.562788 |

---

Cpl [ 2a 1a' ] (Table S-3)

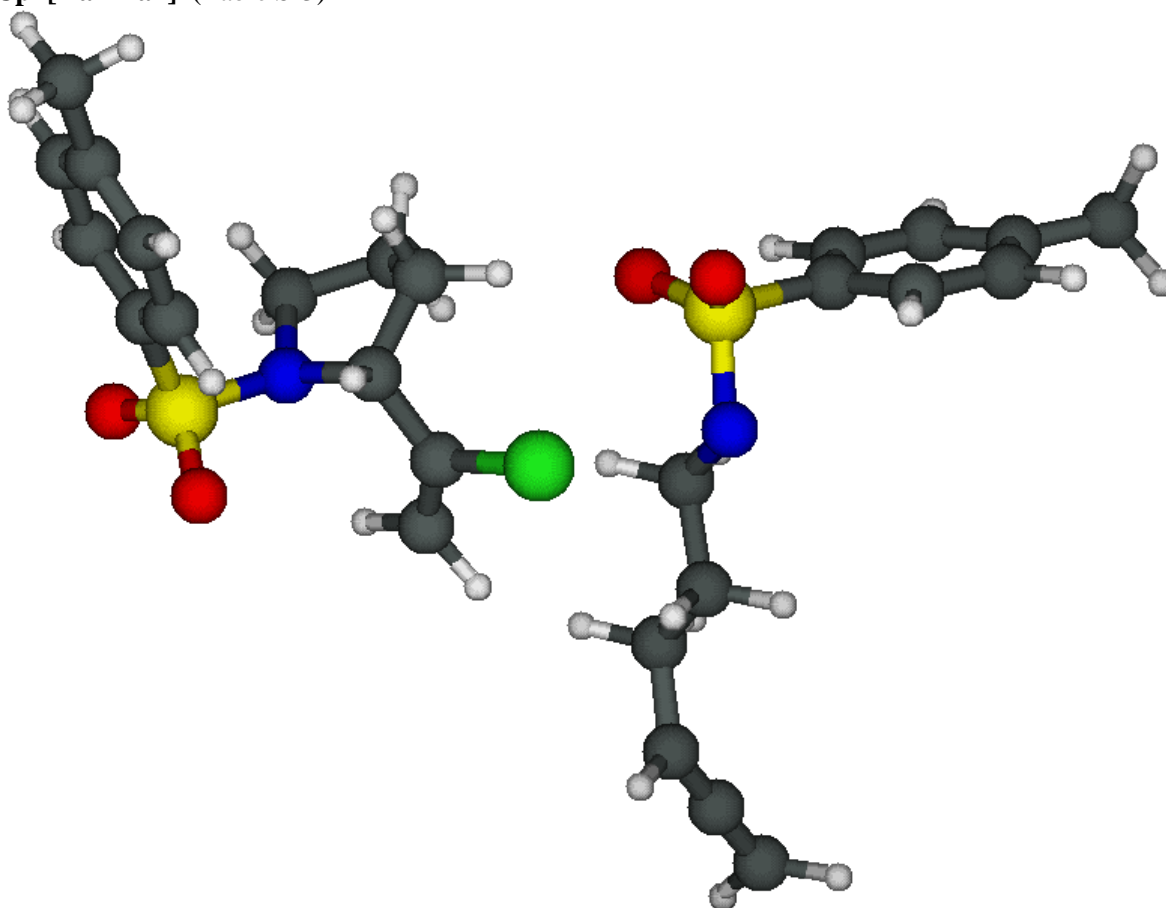


---

|    |    |   |           |           |           |
|----|----|---|-----------|-----------|-----------|
| 1  | 7  | 0 | -0.018872 | 0.008175  | -0.074490 |
| 2  | 6  | 0 | -0.031080 | 0.061333  | 1.397476  |
| 3  | 6  | 0 | 1.442871  | 0.049665  | 1.749415  |
| 4  | 1  | 0 | -0.565461 | 0.946793  | 1.742450  |
| 5  | 1  | 0 | -0.531826 | -0.824514 | 1.810086  |
| 6  | 6  | 0 | 2.035192  | -0.835135 | 0.669776  |
| 7  | 1  | 0 | 1.863647  | 1.056639  | 1.679880  |
| 8  | 1  | 0 | 1.626875  | -0.318785 | 2.758177  |
| 9  | 6  | 0 | 1.304260  | -0.364095 | -0.587118 |
| 10 | 1  | 0 | 3.118425  | -0.762362 | 0.585795  |
| 11 | 1  | 0 | 1.772368  | -1.882337 | 0.852345  |
| 12 | 6  | 0 | 1.972811  | 0.801730  | -1.261648 |
| 13 | 1  | 0 | 1.227015  | -1.172432 | -1.322220 |
| 14 | 6  | 0 | 1.531463  | 2.042562  | -1.341303 |
| 15 | 1  | 0 | 2.079434  | 2.811031  | -1.870923 |
| 16 | 1  | 0 | 0.575718  | 2.300793  | -0.902243 |
| 17 | 16 | 0 | -1.368191 | -0.451882 | -0.876642 |
| 18 | 6  | 0 | -1.498481 | -2.192682 | -0.612420 |
| 19 | 8  | 0 | -2.464759 | 0.177344  | -0.208977 |
| 20 | 8  | 0 | -1.121403 | -0.236128 | -2.267697 |
| 21 | 6  | 0 | -2.179236 | -2.674461 | 0.495484  |
| 22 | 6  | 0 | -2.225656 | -4.037646 | 0.728020  |
| 23 | 6  | 0 | -1.602817 | -4.934537 | -0.130515 |
| 24 | 6  | 0 | -0.934354 | -4.430531 | -1.243621 |
| 25 | 6  | 0 | -0.879388 | -3.074072 | -1.490941 |
| 26 | 1  | 0 | -2.689998 | -1.985253 | 1.157091  |
| 27 | 1  | 0 | -2.765321 | -4.414549 | 1.590563  |
| 28 | 6  | 0 | -1.652044 | -6.405822 | 0.112879  |

|    |    |   |           |           |           |
|----|----|---|-----------|-----------|-----------|
| 29 | 1  | 0 | -0.458330 | -5.121000 | -1.932895 |
| 30 | 1  | 0 | -0.380514 | -2.695066 | -2.374839 |
| 31 | 1  | 0 | -2.120768 | -6.926968 | -0.725885 |
| 32 | 1  | 0 | -0.646101 | -6.819841 | 0.220264  |
| 33 | 1  | 0 | -2.214131 | -6.646882 | 1.015753  |
| 34 | 17 | 0 | 3.501398  | 0.364632  | -1.987830 |
| 35 | 7  | 0 | 5.780672  | 1.926969  | -0.407139 |
| 36 | 6  | 0 | 4.920488  | 3.053481  | -0.235929 |
| 37 | 6  | 0 | 4.977966  | 3.975810  | -1.431080 |
| 38 | 1  | 0 | 3.887697  | 2.708347  | -0.047347 |
| 39 | 1  | 0 | 5.195296  | 3.591181  | 0.689190  |
| 40 | 6  | 0 | 4.070737  | 5.181637  | -1.255386 |
| 41 | 1  | 0 | 6.010130  | 4.302962  | -1.590152 |
| 42 | 1  | 0 | 4.692205  | 3.414040  | -2.327827 |
| 43 | 6  | 0 | 4.069817  | 6.066955  | -2.462520 |
| 44 | 1  | 0 | 3.047060  | 4.834755  | -1.060864 |
| 45 | 1  | 0 | 4.374439  | 5.757421  | -0.375481 |
| 46 | 6  | 0 | 4.413813  | 7.319831  | -2.467720 |
| 47 | 1  | 0 | 3.769453  | 5.607255  | -3.404267 |
| 48 | 6  | 0 | 4.754002  | 8.572082  | -2.464807 |
| 49 | 1  | 0 | 4.024098  | 9.359130  | -2.298566 |
| 50 | 1  | 0 | 5.780875  | 8.883379  | -2.633190 |
| 51 | 16 | 0 | 5.840311  | 0.855026  | 0.866423  |
| 52 | 6  | 0 | 7.263789  | 1.511006  | 1.656913  |
| 53 | 8  | 0 | 4.709393  | 0.994368  | 1.740818  |
| 54 | 8  | 0 | 6.144814  | -0.424842 | 0.309426  |
| 55 | 6  | 0 | 7.130435  | 2.275882  | 2.804992  |
| 56 | 6  | 0 | 8.263426  | 2.791886  | 3.405530  |
| 57 | 6  | 0 | 9.526108  | 2.564377  | 2.869297  |
| 58 | 6  | 0 | 9.632656  | 1.800289  | 1.707458  |
| 59 | 6  | 0 | 8.515421  | 1.274359  | 1.097563  |
| 60 | 1  | 0 | 6.147404  | 2.446435  | 3.227611  |
| 61 | 1  | 0 | 8.169363  | 3.381291  | 4.311364  |
| 62 | 6  | 0 | 10.751974 | 3.111757  | 3.517685  |
| 63 | 1  | 0 | 10.614269 | 1.619182  | 1.281361  |
| 64 | 1  | 0 | 8.598845  | 0.677795  | 0.196687  |
| 65 | 1  | 0 | 11.389793 | 2.303704  | 3.886469  |
| 66 | 1  | 0 | 11.350292 | 3.685787  | 2.805930  |
| 67 | 1  | 0 | 10.509432 | 3.759356  | 4.360587  |

---
